# Estimating the genome-wide contribution of selection to temporal allele frequency change

Vince Buffalo<sup>\*,†,1</sup> and Graham Coop<sup>†</sup>

<sup>\*</sup>Population Biology Graduate Group

<sup>†</sup>Center for Population Biology, Department of Evolution and Ecology, University of California, Davis, CA 95616

<sup>1</sup>Email for correspondence: vsbuffalo@ucdavis.edu

October 8, 2019

## Abstract

Rapid phenotypic adaptation is often observed in natural populations and selection experiments. However, detecting the genome-wide impact of this selection is difficult, since adaptation often proceeds from standing variation and selection on highly polygenic traits, both of which may leave faint genomic signals indistinguishable from a noisy background of genetic drift. One promising signal comes from the genome-wide covariance between allele frequency changes observable from temporal genomic data, e.g. evolve-and-resequence studies. These temporal covariances reflect how the change in neutral allele frequency at one timepoint is predictive of the changes at later timepoints when there is heritable fitness variation in the population, as neutral alleles can remain associated with selected alleles over time. Since genetic drift does not lead to temporal covariance, we can use these covariances to estimate what fraction of the variation in allele frequency change through time is driven by linked selection. Here, we reanalyze two *Drosophila simulans* evolve-and-resequence studies, and one artificial selection experiment in mice, to quantify the effects of linked selection over short timescales using covariance among time-points and across replicates. We estimate that at least 17% to 37% of allele frequency change is driven by selection in these experiments. Against this background of positive genome-wide temporal covariances we also identify signals of negative temporal covariance corresponding to reversals in the direction of selection for a reasonable proportion of loci over the time course of a selection experiment. Overall, we find that in the three studies we analyzed, linked selection has a large impact on short-term allele frequency dynamics that is readily distinguishable from genetic drift.

## 1 Introduction

A long-standing problem in evolutionary genetics is quantifying the roles of genetic drift and selection in shaping genome-wide allele frequency changes. Selection can both directly and indirectly affect allele frequencies, with the indirect effect coming from the action of selection on correlated loci elsewhere in genome e.g. linked selection (Maynard Smith and Haigh 1974, Charlesworth et al. 1993; Nordborg et al. 1996; see Barton 2000 for a review). Previous work on this question has mostly focused on teasing apart the impacts of drift and selection on genome-wide diversity using population samples from a single contemporary timepoint, often by modeling the correlation

30 between regional recombination rate, gene density, and diversity created in the presence of linked  
31 selection (Cutter and Payseur 2013; Sella et al. 2009). This approach has shown linked selection has  
32 a major role in shaping patterns of genome-wide diversity across the genomes of a range of sexual  
33 species (Andersen et al. 2012; Andolfatto 2007; Begun et al. 2007; Beissinger et al. 2016; Cutter  
34 and Choi 2010; Elyashiv et al. 2016; Macpherson et al. 2007; Sattath et al. 2011; Williamson et al.  
35 2014), and has allowed us to quantify the relative influence of positive selection (hitchhiking) and  
36 negative selection (background selection; Andolfatto 2007; Elyashiv et al. 2016; Hernandez et al.  
37 2011; Macpherson et al. 2007; McVicker et al. 2009; Nordborg et al. 2005). However, we lack an  
38 understanding of how genome-wide linked selection acts over time.

39 There are numerous examples of rapid phenotypic adaptation (Franks et al. 2007; Grant and  
40 Grant 2006, 2011; Reznick et al. 1997) and rapid, selection-driven genomic evolution in asexual  
41 populations (Baym et al. 2016; Bennett et al. 1990; Good et al. 2017). Yet the polygenic nature of  
42 fitness makes detecting the impact of selection on genome-wide variation over short timescales in  
43 sexual populations remarkably difficult. This is because the effect of selection on a polygenic trait  
44 (such as fitness) is distributed across loci in proportion to their effect sizes. This can lead to subtle  
45 allele frequency shifts on standing variation that are difficult to distinguish from background levels of  
46 genetic drift and sampling variance. However, increasingly genomic experimental evolution studies  
47 with multiple timepoints, and in some cases multiple replicate populations, are being used to detect  
48 large effect selected loci (Turner and Miller 2012; Turner et al. 2011) and differentiate modes of  
49 selection (Barghi et al. 2019; Burke et al. 2010; Therikildsen et al. 2019). In addition these temporal-  
50 genomic studies have begun in wild populations, some with the goal of finding variants that exhibit  
51 frequency changes consistent with fluctuating selection (Bergland et al. 2014; Machado et al. 2018).  
52 In a previous paper, we proposed that one useful signal for understanding the genome-wide impact of  
53 polygenic linked selection detectable from genomic studies with multiple timepoints is the temporal  
54 autocovariance in allele frequency changes (Buffalo and Coop 2019). These covariances are directly  
55 estimable from temporal genomic data and are created when the loci that underly heritable fitness  
56 variation perturb the frequencies of linked neutral alleles; in contrast, when genetic drift acts  
57 alone in a closed population, these covariances are zero in expectation. Mathematically, temporal  
58 covariances are useful because it is natural to decompose the total variance in allele frequency change  
59 across a set of time intervals into the variances and covariances in allele frequency change among  
60 time intervals. Furthermore, biologically, these covariances reflect the extent to which neutral allele  
61 frequency changes in one generation predict changes in another due to a shared selection pressures  
62 and associations to selected loci.

63 Here, we provide the first empirical analyses to quantify the impact of linked selection acting over  
64 short timescales (tens of generations) across two evolve and re-sequence studies (Barghi et al. 2019;  
65 Kelly and Hughes 2019), and an artificial selection experiment (Castro et al. 2019). We repeatedly  
66 find a signal of temporal covariance, consistent with linked selection acting to significantly perturb  
67 genome-wide allele frequency changes across the genome in a manner that other approaches would  
68 not be able differentiate from genetic drift. We estimate the lower bound on the proportion of  
69 total variation in allele frequency change caused by selection, and the correlation between allele  
70 frequency changes between replicate populations caused by the response to convergent selection  
71 pressures. Overall, we demonstrate that linked selection has a powerful role in shaping genome-  
72 wide allele frequency changes over very short timescales.

| Study                   | Species            | Selection      | Replicates | Pop. Size | Generations | Timepoints |
|-------------------------|--------------------|----------------|------------|-----------|-------------|------------|
| Kelly and Hughes (2019) | <i>D. simulans</i> | lab adaptation | 3          | ~1100     | 14          | 2          |
| Barghi et al. (2019)    | <i>D. simulans</i> | lab adaptation | 10         | ~1000     | 60          | 7          |
| Castro et al. (2019)    | <i>M. musculus</i> | tibiae length  | 2          | 32        | 20          | 2          |
|                         |                    | control        | 1          | 28        |             |            |

**Table 1:** A summary of the main selection studies we analyzed.

## 2 Results

We first analyzed Barghi et al. (2019), an evolve-and-resequence study with ten replicate populations exposed to a high temperature lab environment and evolved for 60 generations, and sequenced every ten generations. Using the seven timepoints and ten replicate populations, we estimated the genome-wide  $6 \times 6$  temporal covariance matrix  $\mathbf{Q}$  for each of the ten replicates. Each row of these matrices represent the temporal covariance  $\text{Cov}(\Delta_{10}p_s, \Delta_{10}p_t)$ , between the allele frequency change (in ten-generation intervals, denoted  $\Delta_{10}p_t$ ) in some initial reference generation  $s$  (the row of the matrix), and some later timepoint  $t$  (the column of the matrix). We corrected these matrices for biases created due to sampling noise, and normalize the entries for heterozygosity (see Supplementary Materials Sections 1.1.2 and 1.1.4). These covariances are expected to be zero when only drift is acting, as only heritable variation for fitness can create covariance between allele frequency changes in a closed population (Buffalo and Coop 2019). Averaging across the ten replicate temporal covariances matrices, we find temporal covariances that are statistically significant (95% block bootstraps CIs do not contain zero), consistent with linked selection perturbing genome-wide allele frequency changes over very short time periods. The covariances between all adjacent time intervals are positive and then decay towards zero as we look at more distant time intervals (Figure 1 A), as expected when directional selection affects linked variants' frequency trajectories until ultimately linkage disequilibrium and the additive genetic variance for fitness associated with neutral alleles decays (Buffalo and Coop 2019). The temporal covariances per replicate are noisier but this general pattern holds; see Supplementary Figure S6. Barghi et al. (2019)'s design means that the covariances we see in adjacent time intervals are on average ten generations apart, and given the temporal decay in covariance we see, the covariances on shorter time-scales (e.g. if adjacent generations had been sequenced) may well be higher yet (see Supplementary Material Section 1.1.5 for more details).

One concern is that these covariances reflect the localized impact of a few large-effect loci rather than selection on a polygenic trait. Since our covariances are essentially averages over loci, the covariance estimate can be strongly affected by a single outlier region. To test whether large outlier regions drive the genome-wide signal we see in the Barghi et al. (2019) data, we calculate the covariances in 100kb windows along the genome (we refer to these as windowed covariances throughout) and take the median windowed covariance, and trimmed-mean windowed covariance, as a measure of the genome-wide covariance robust to large-effect loci. These robust estimates (Supplementary Table S1 and Supplementary Figure S7) confirm the patterns we see using the mean covariance, confirming that genomic temporal covariances are non-zero due to the impact of selection acting across many genomic windows.

While the presence of positive temporal covariances is consistent with selection affecting allele frequencies over time, this measure is not easily interpretable. We can calculate a more intuitive measure from the temporal covariances to quantify the impact of selection on allele frequency

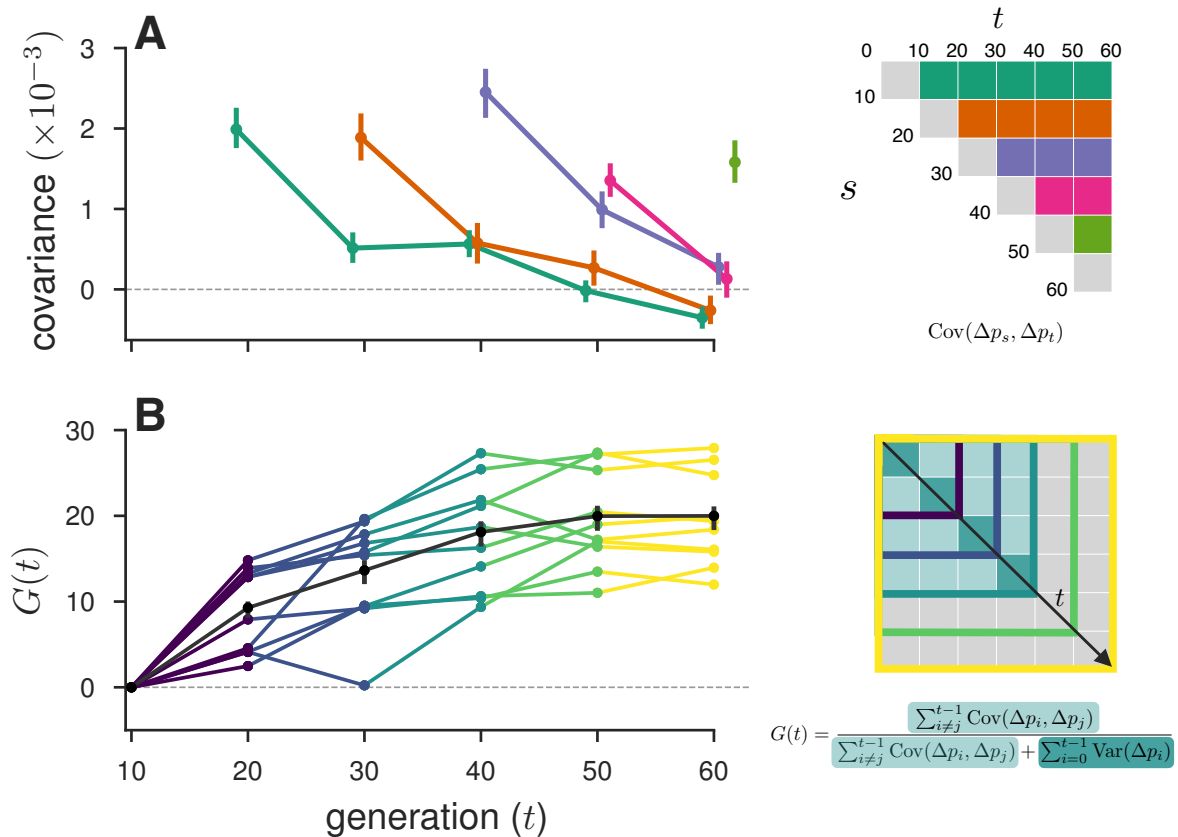

**Figure 1:** A: Temporal covariance, averaged across all ten replicate populations, through time from the Barghi et al. (2019) study. Each line depicts the temporal covariance  $\text{Cov}(\Delta p_s, \Delta p_t)$  from some reference generation  $s$  to a later time  $t$  which varies along the x-axis; each line corresponds to a row of the upper-triangle of the temporal covariance matrix with the same color (upper right). The ranges around each point are 95% block-bootstrap confidence intervals. B: The proportion of the total variance in allele frequency change explained by linked selection,  $G(t)$ , as it varies through time  $t$  along the x-axis. The black line is the  $G(t)$  averaged across replicates, with the 95% block-bootstrap confidence interval. The other lines are the  $G(t)$  for each individual replicate, with colors indicating what subset of the temporal-covariance matrix to the right is being included in the calculation of  $G(t)$ .

110 change: the ratio of total covariance in allele frequency change to the total variance in allele  
 111 frequency change. We denote the change in allele frequency as  $\Delta p_t = p_{t+1} - p_t$ , where  $p_t$  is the allele  
 112 frequency in generation  $t$ . Since the total variation in allele frequency change can be partitioned  
 113 into variance and covariance components,  $\text{Var}(p_t - p_0) = \sum_{i=0}^{t-1} \text{Var}(\Delta p_i) + \sum_{i \neq j}^{t-1} \text{Cov}(\Delta p_i, \Delta p_j)$  (we  
 114 bias correct these for sequencing depth), and the covariances are zero when drift acts alone, this is  
 115 a lower bound on how much of the variance in allele frequency change is caused by linked selection  
 116 (Buffalo and Coop 2019). We call this measure  $G(t)$ , defined as

$$G(t) = \frac{\sum_{i \neq j}^{t-1} \text{Cov}(\Delta p_i, \Delta p_j)}{\text{Var}(p_t - p_0)} \quad (1)$$

117 which estimates the effect of selection on allele frequency change between the initial generation 0

118 and some later generation  $t$ , which can be varied to see how this quantity grows through time.  
119 Since Barghi et al. (2019) experiment is sequenced every ten generations, in the numerator for  
120 the covariance we use the allele frequency changes between adjacent timepoints, which are ten  
121 generations apart. Consequently, this leads our measure  $G(t)$  to be strongly conservative, since the  
122 temporal covariances within each ten-generation block are not directly observable, and thus are not  
123 included in the numerator of  $G(t)$ . Still, we find a remarkably strong signal. Greater than 20% of  
124 total, genome-wide allele frequency change over 60 generations is the result of selection (Figure 1  
125 B).

126 Additionally, we looked for a signal of temporal autocovariance in Bergland et al. (2014), a study  
127 that collected *Drosophila melanogaster* through Spring-Fall season pairs across three years. If there  
128 was a strong pattern of genome-wide fluctuating selection, we might expect a pattern of positive  
129 covariances between similar seasonal changes, e.g. Spring-Fall in two adjacent years, and negative  
130 covariances between dissimilar seasonal changes, e.g. Spring-Fall and Fall-Spring in two adjacent  
131 years. However, we find no such signal over years; we discuss this in more depth in Supplementary  
132 Materials Section 1.5.

133 The replicate design of Barghi et al. (2019) allows us to quantify another covariance: the co-  
134 variance in allele frequency change between replicate populations experiencing convergent selection  
135 pressures. These between-replicate covariances are created in the same way as temporal covari-  
136 ances: neutral alleles linked to a particular fitness background are expected to have allele frequency  
137 changes in the same direction if the selection pressures are similar. Intuitively, where temporal  
138 covariances reflect that neutral alleles associated with heritable fitness backgrounds are predictive  
139 of frequency changes between generations, replicate covariances reflect that heritable fitness back-  
140 grounds common to each replicate predict (under the same selection pressures) frequency changes  
141 between replicates. We measure this through a statistic similar to a correlation, which we call the  
142 convergent correlation: the ratio of average between-replicate covariance across all pairs to the  
143 average standard deviation across all pairs of replicates,

$$\text{cor}(\Delta p_s, \Delta p_t) = \frac{\mathbb{E}_{A \neq B} (\text{Cov}(\Delta p_{s,A}, \Delta p_{t,B}))}{\mathbb{E}_{A \neq B} (\sqrt{\text{Var}(\Delta p_{s,A}) \text{Var}(\Delta p_{t,B})})} \quad (2)$$

144 where  $A$  and  $B$  here are two replicate labels, and for the Barghi et al. (2019) data, we use  $\Delta_{10} p_t$ .  
145 We've calculated the convergent correlation for all rows of the replicate covariance matrices.  
146 Like temporal covariances, we visualize these through time (Figure 2 A), with each line representing  
147 the convergent correlation from a particular reference generation  $s$  as it varies with  $t$  (shown on  
148 the x-axis). In other words, each of the colored lines corresponds to the like-colored row of the  
149 convergence correlation matrix (upper left in Figure 2 A). We find these convergent covariances  
150 are relatively weak, and decay very quickly from an initial value of about 0.1 (95% block bootstrap  
151 confidence intervals [0.094, 0.11]) to around 0.01 (95% CIs [0.0087, 0.015]) within 20 generations.  
152 This suggests that while a reasonable fraction of the initial response is shared over the replicates,  
153 this is followed by a rapid decay, a result consistent with the primary finding of the original Barghi  
154 et al. (2019) study: that alternative loci contribute to longer term adaptation across the different  
155 replicates.

156 A benefit of between-replicate covariances is that unlike temporal covariances, these can be  
157 calculated with only two sequenced timepoints and a replicated study design. This allowed us to  
158 assess the impact of linked selection in driving convergent patterns of allele frequency change across

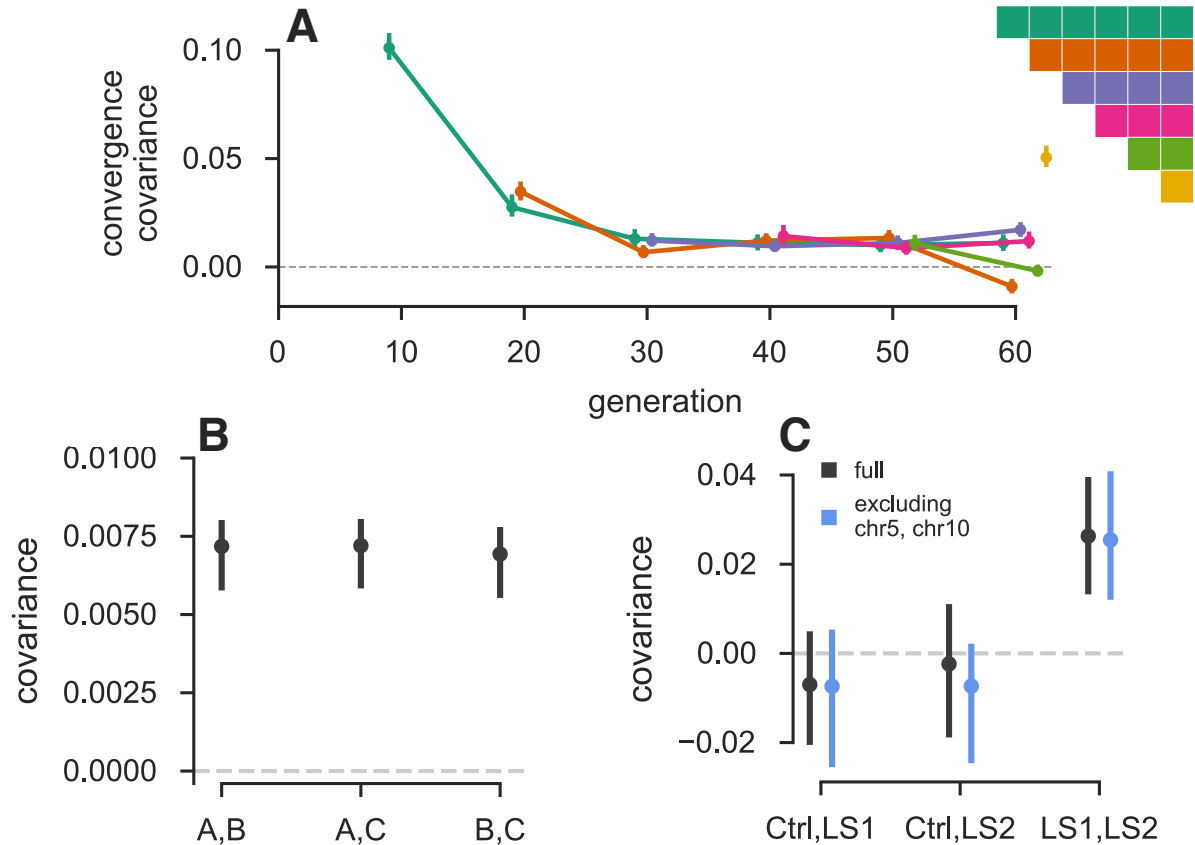

**Figure 2:** **A:** The convergence correlation, averaged across Barghi et al. (2019) replicate pairs, through time. Each line represents the convergence correlation  $\text{cor}(\Delta p_s, \Delta p_t)$  from a starting reference generation  $s$  to a later time  $t$ , which varies along the x-axis; each line corresponds to a row of the temporal convergence correlation matrix depicted to the right. We note that convergent correlation for the last timepoint is an outlier; we are unsure as to the cause of this, e.g. it does not appear to be driven by a single pair of replicates. **B:** The convergence covariance between individual pairs of replicates in the Kelly and Hughes (2019) data. **C:** The convergence covariance between individual pairs of replicates in (Castro et al. 2019) data, for the two selection lines (LS1 and LS2) and the control (Ctrl); gray CIs are those using the complete dataset, blue CIs exclude chromosomes 5 and 10 which harbor the two regions Castro et al. (2019) found to have signals of parallel selection between LS1 and LS2.

159 replicate populations in two other studies. First, we reanalyzed the selection experiment of Kelly  
 160 and Hughes (2019), which evolved three replicate wild populations of *Drosophila simulans* for 14  
 161 generations adapting to a novel laboratory environment. Since each replicate was exposed to the  
 162 same selection pressure and share linkage disequilibria common to the original natural founding  
 163 population, we expected each of the three replicate populations to have positive between-replicate  
 164 covariances. We find all three pairwise between-replicate covariances are positive and statistically  
 165 significant (Figure 2 B. We estimate the convergent correlation coefficient across these replicates  
 166 as 0.36 (95% CI [0.31, 0.40]). Similarly, we can calculate the proportion of the total variance in  
 167 allele frequency change from convergent selection pressure analogous to  $G$  where the numerator is  
 168 is the convergent covariance and the denominator is the total variance (see Supplementary Material



169 1.3). We find that 37% of the total variance is due to shared allele frequency changes caused by  
170 selection (95% CI [29%, 41%]; these are similar to the convergence correlation, since the variance  
171 is relatively constant across the replicates.

172 Next, we reanalyzed the Longshanks selection experiment, which selected for longer tibiae length  
173 relative to body size in mice, leading to a response to selection of about 5 standard deviations over  
174 the course of twenty generations (Castro et al. 2019; Marchini et al. 2014). This study includes  
175 two independent selection lines, Longshanks 1 and 2 (LS1 and LS2), and an unselected control line  
176 (Ctrl). Consequently, this selection experiment offers a useful control to test our between-replicate  
177 covariances: we expect to see positive between-replicate covariance in the comparison between the  
178 two Longshanks selection lines, but not between the two pairwise comparisons between the control  
179 line and each of the two Longshanks lines. We find that this is the case (gray confidence intervals in  
180 Figure 2 C), with the two Longshanks comparisons to the control line not being significantly differ-  
181 ent from zero, while the comparison between the two Longshanks lines is statistically significantly  
182 different from zero (CIs [0.0129, 0.0400]).

183 One finding in the Longshanks study was that two major-effect loci showed parallel frequency  
184 shifts between the two selection lines: a region harboring the gene *Nkx3-2* known to be involved  
185 in limb development, and another region containing six other candidate genes. We were curious  
186 to what extent our genome-wide covariances were being driven by these two outlier large-effect  
187 loci, so we excluded them from the analysis. Since we do not know the extent to which linkage  
188 disequilibrium around these large-effect loci affects neighboring loci, we took the conservative pre-  
189 caution of excluding the entire chromosomes these loci reside on (chromosomes 5 and 10), and  
190 re-calculating the temporal covariances. We find excluding these large effect loci has little impact  
191 on the confidence intervals (blue confidence intervals in Figure 2 C), indicating that these across-  
192 replicate covariances are indeed driven by a large number of loci. This is consistent with a signal of  
193 selection on a polygenic trait driving genome-wide change, although we note that large-effect loci  
194 can contribute to the indirect change at unlinked loci (Robertson 1961; Santiago and Caballero  
195 1995).

196 The presence of an unselected control line provides an alternative way to partition the ef-  
197 fects of linked selection and genetic drift: we can compare the total variance in allele frequency  
198 change of the control line (which excludes the effect of artificial selection on allele frequencies)  
199 to the total variance in frequency change of the Longshanks selection lines. We can partition  
200 the allele frequency change between the two timepoints (20 generations apart) for a Longshanks  
201 line as  $\Delta p_{t,LS1} = \Delta_D p_{t,LS1} + \Delta_U p_{t,LS1} + \Delta_S p_{t,LS}$  where these terms are the decomposition in  
202 the allele frequency change due to drift in Longshanks replicate 1 ( $\Delta_D p_{t,LS1}$ ), selection unique to  
203 the LS1 replicate ( $\Delta_U p_{t,LS1}$ ), and selection response shared between the two Longshanks repli-  
204 cates ( $\Delta_S p_{t,LS}$ ) respectively (and similarly for the Longshanks two line, LS2). By construction we  
205 will assume that each of these terms are uncorrelated within replicates, and that only the shared  
206 term covaries between the replicates. Assuming that we can approximate the contribution of ge-  
207 netic drift in the LS lines as the variance in allele frequency change observed in the control, i.e.  
208  $\text{Var}(\Delta p_{t,Ctrl}) = \text{Var}(\Delta_D p_{t,LS2}) = \text{Var}(\Delta_D p_{t,LS2})$ , then we can estimate the increase in variance in  
209 allele frequency change due to selection as  $(\text{Var}(\Delta p_{t,LS1}) + \text{Var}(\Delta p_{t,LS2}))/2 - \text{Var}(\Delta p_{t,Ctrl})$  and the  
210 shared effect of selection across selected lines as  $\text{Cov}(\Delta p_{t,LS1}, \Delta p_{t,LS2})$  (see Supplementary Material  
211 Section 1.3 for more details). We estimate at least 32% (95% CI [21%, 48%]) of the variance in  
212 allele frequency change is driven by the effects of selection, of which 14% (95% CI [3%, 33%]) is  
213 estimated to be unique to a selection line, and 17% (95% CI [9%, 23%]) is the effect of shared

214 selection between the two Longshanks selection lines (and the value of the convergence correlation  
215 between the Longshanks lines, a related statistic, is 0.18, 95% CI [0.0743, 0.254]).

216 Finally, we observed that in the longest study we analyzed (Barghi et al. 2019), some genome-  
217 wide temporal covariances become negative at future timepoints (see the first two rows in Figure  
218 1 A). This shows that alleles that were on average going up initially are later going down in  
219 frequency, i.e. that the average direction of selection experienced by alleles has flipped. This must  
220 reflect either a change in the environment or the genetic background, due to epistatic relationships  
221 among alleles altered by frequency changes or recombination breaking up selective alleles. Such  
222 reversals of selective dynamics could be occurring at other timepoints but the signal of a change  
223 in the direction of selection at particular loci may be washed out when we calculate our genome-  
224 wide average temporal covariances. To address this limitation, we calculated the distribution  
225 of the temporal covariances over 100kb windowed covariances (Figure 3 shows these distributions  
226 pooling across all replicates; see Supplementary Figure S9 for individuals replicates). The covariance  
227 estimate of each genomic window will be noisy, due to sampling and genetic drift, and the neutral  
228 distribution of the covariance is complicated due to linkage disequilibria (which can occur over  
229 long physical distances in E&R and selection studies, Baldwin-Brown et al. 2014; Nuzhdin and  
230 Turner 2013). To address this, we have developed a permutation-based procedure that constructs  
231 an empirical null distribution by randomly flipping the signs of the allele frequency changes per-  
232 genomic window. This destroys the systematic covariances created by linked selection and creates a  
233 sampling distribution of the covariances spuriously created by neutral genetic drift while preserving  
234 the complex dependencies between adjacent loci created by linkage disequilibrium. This empirical  
235 neutral null distribution is conservative in the sense that the variances of the covariances are wider  
236 than expected under drift alone as they include the effect of selection on the allele frequency  
237 change within a time-interval, just not between time-intervals. We see (Figure 3 A and B) that  
238 windowed temporal covariances between close timepoints are skewed positive (a heavy right tail),  
239 while between more distant timepoints these windowed temporal covariances tend to shift to become  
240 more negative (a heavy left tail). We quantified the degree to which the left and right tails are  
241 inflated compared to the null distribution as a function of time, and see excesses in both tails in  
242 Figure 3 C. This finding is also robust to sign-permuting allele frequency changes on a chromosome-  
243 level, the longest extent that gametic linkage disequilibria can extend (Supplementary Figure S12).  
244 We see a striking pattern that the windowed covariances not only decay towards zero, but in fact  
245 become negative through time, consistent with many regions in the genome having had a reversed  
246 fitness effect at later timepoints.

### 247 3 Discussion

248 Since the seminal analysis of Maynard Smith and Haigh (1974) demonstrating that linked neutral  
249 diversity is reduced as an advantageous polymorphism arises and sweeps to fixation, over four  
250 decades of theoretical and empirical research has enriched our understanding of linked selection.  
251 One under-used approach to understand the genome-wide effects of selection on standing variation,  
252 e.g. selection on an infinitesimal polygenic trait, stems from an early quantitative genetic model of  
253 linked selection (Robertson 1961) and its later developments (Santiago and Caballero 1995, 1998;  
254 Woolliams et al. 1993; Wray and Thompson 1990; see also Barton 2000 for a comparison of these  
255 models with classic hitchhiking models). Implicit in these models is that autocovariance between  
256 allele frequency change is created when there is heritable fitness variation in the population, a signal



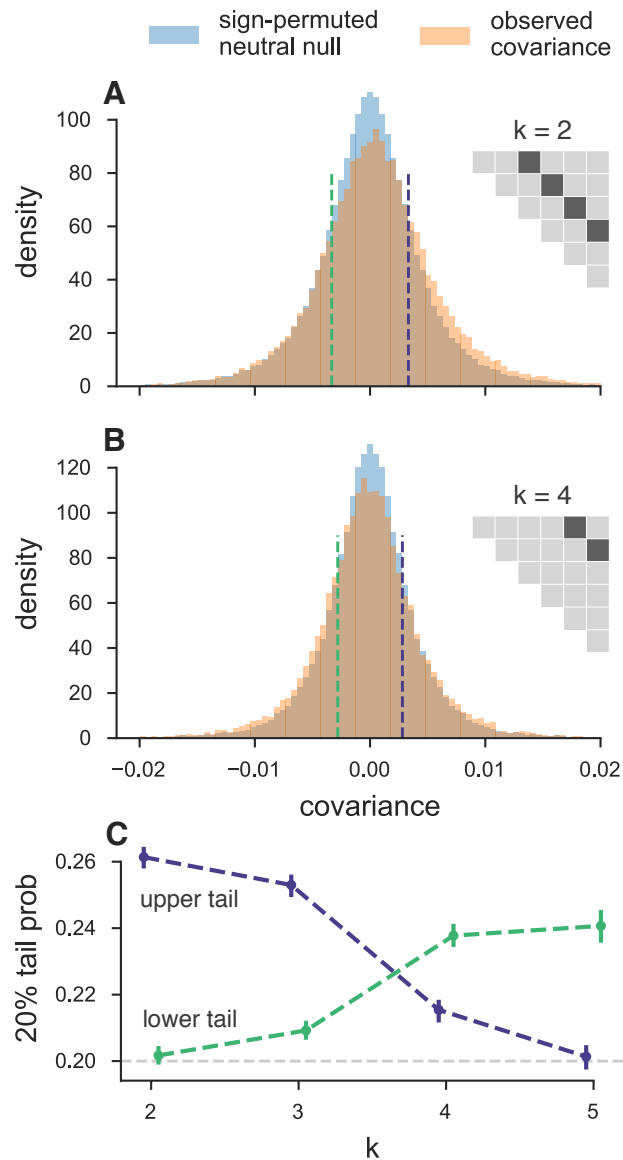

**Figure 3: A, B:** The distribution of temporal covariances calculated in 100kb genomic windows from the Barghi et al. (2019) study, plotted alongside an empirical neutral null distribution created by recalculating the windowed covariances on 1,000 sign permutations of allele frequency changes within tiles. The histogram bin number is 88, chosen by cross validation (Supplementary Materials S8). In subfigure **A**, windowed covariances  $\text{Cov}(\Delta p_t, \Delta p_{t+k})$  are separated by  $k = 2 \times 10$  generations and in subfigure **B** the covariances are separated by  $k = 4 \times 10$  generations; each  $k$  is an off-diagonal from the variance diagonal of the temporal covariance matrix (see cartoon of upper-triangle of covariance matrix in subfigures **A** and **B**, where the first diagonal is the variance, and the dark gray indicates which off-diagonal of the covariance matrix is plotted in the histograms). **C:** The lower and upper tail probabilities of the observed windowed covariances, at 20% and 80% quintiles of the empirical neutral null distribution, for varying time between allele frequency changes (i.e. which off-diagonal  $k$ ). The confidence intervals are 95% block-bootstrap confidence intervals, and the light gray dashed line indicates the 20% tail probability expected under the neutral null. Similar figures for different values of  $k$  are in Supplementary Figures S10.

257 that may be readily detected from temporal genomic data (Buffalo and Coop 2019). Depending  
258 on how many loci affect fitness, such a strong effect of linked selection may not be differentiable  
259 from genetic drift using only single contemporary population samples or looking at temporal  
260 allele frequency change at each locus in isolation. In this way, averaging summaries of temporal  
261 data allows us to sidestep the key problem of detecting selection from standing variation: that the  
262 genomic footprint leaves too soft of a signature to differentiate from a background of genetic drift.  
263 In fact we find that the temporal covariance signal is detectable even in the most extremely difficult  
264 to detect soft sweep case: polygenic selection on highly polygenic traits (Buffalo and Coop 2019).

265 It is worth building some intuition why temporal covariance allows us to detect such faint signals  
266 of polygenic linked selection from temporal genomic data. Each variant is subject to both variance  
267 in allele frequency due to drift and sampling noise, which at any locus may swamp the temporal  
268 covariance signal and creates spurious covariances. However, these spurious covariances do not  
269 share a directional signal whereas the covariances created by linked selection do; consequently,  
270 averaging across the entire genome, the temporal signal exceeds sampling noise.

271 Our analyses reveal that a sizable proportion of allele frequency change in these populations is  
272 due to the (indirect) action of selection. Capitalizing on replicated designs, we characterized the  
273 extent to which convergent selection pressures lead to parallel changes in allele frequencies across  
274 replicate populations, and found that a reasonable proportion of the response is shared across short  
275 timescales. These likely represent substantial under-estimates of the contribution of linked selection  
276 because the studies we have reanalyzed do not sequence the population each generation, preventing  
277 us from including the effects of stronger correlations between adjacent generations. Furthermore,  
278 our estimation methods are intentionally conservative, for example they exclude the contribution  
279 of selection that does not persist across generations and selection that reverses sign; thus they can  
280 be seen as a strong lower bound of the effects of selection.

281 These estimates of the contribution of selection could be refined by using patterns of LD and  
282 recombination which would allow us to more fully parameterize a linked-selection model of temporal  
283 allele frequency change (Buffalo and Coop 2019). The basic prediction is that regions of higher  
284 linkage disequilibrium and lower recombination should have greater temporal autocovariance than  
285 regions with lower LD and higher recombination. However, one limitation of these pooled sequence  
286 datasets is that none of the studies we reanalyzed estimated linkage disequilibria data for the  
287 evolved populations. While there are LD data for a natural population of *D. simulans* (Howie et al.  
288 2018; Signor et al. 2018), we did not find a relationship between temporal covariance and LD. We  
289 believe this is driven by the idiosyncratic nature of LD in evolve-and-resequence populations, which  
290 often extends over large genomic distances (Kelly and Hughes 2019; Nuzhdin and Turner 2013).  
291 Future studies complete with LD data and recombination maps would allow one to disentangle the  
292 influence of closely linked sites from more distant sites in causing temporal autocovariance, and  
293 allow the fitting of more parametric models to estimate population parameters such as the additive  
294 genetic variation for fitness directly from temporal genomic data alone (Buffalo and Coop 2019).

295 Our primary focus here has been on evolution in laboratory populations. It is unclear whether  
296 we should expect a similar impact of selection in natural populations. In some of these experiments,  
297 selection pressures may have been stronger or more sustained than in natural populations (Hairston  
298 et al. 2005; Hendry and Kinnison 1999). Conversely, these lab populations were maintained at very  
299 small effective population sizes, estimated at 300, 450, and 45 for the Barghi et al. (2019), Kelly and  
300 Hughes (2019), and Castro et al. (2019) studies respectively, which will amplify the role of genetic  
301 drift. The advantage of lab experiments is that they are closed populations, in natural populations

302 temporal covariance could also arise from the systematic migration of alleles from differentiated  
303 populations. Adapting these methods to natural populations will require either populations that  
304 are reasonably closed to migration, or for the effect of migration to be accounted for possibly either  
305 by knowledge of allele frequencies in source populations or the identification of migrant individuals.

306 While it challenging to apply temporal methods to natural populations there is a lot of promise  
307 for these approaches (Bergland et al. 2014; Machado et al. 2018). Efforts to quantify the impact of  
308 linked selection have found obligately sexual organisms have up to an 89% reduction in genome-wide  
309 diversity over long time periods (Comeron 2014; Coop 2016; Corbett-Detig et al. 2015; Elyashiv  
310 et al. 2016; McVicker et al. 2009) Thus linked selection makes a sizeable contribution to long-term  
311 allele frequency change in some species, and there is reason to be hopeful that we could detect this  
312 from temporal data, which would help to resolve the timescales that linked selection act over. In our  
313 reanalysis of the Barghi et al. (2019) study, we find evidence of complex linked selection dynamics,  
314 with selection pressures flipping over time due to either environmental change, the breakup of  
315 epistatic combinations or advantageous haplotypes. Such patterns would be completely obscured  
316 in samples only from contemporary populations. Thus, we can hope to have a much richer picture  
317 of the impact of selection as temporal sequencing becomes more common, allowing us to observe  
318 the effects of ecological dynamics in genomic data (Hairston et al. 2005).

319 Furthermore, understanding the dynamics of linked selection over short timescales will help to  
320 unite phenotypic studies of rapid adaptation with a detectable genomic signature, to address long-  
321 standing questions concerning linked selection, evolutionary quantitative genetics, and the overall  
322 impact selection has on genetic variation.

## 323 4 Acknowledgments

324 We would like to thank the authors of the original studies we've analyzed, including Neda Barghi,  
325 Christian Schlötterer, John Kelly, Kimberly Hughes, Frank Chan, Campbell Rolian, Nick Barton,  
326 Alan Bergland, and Dmitri Petrov. We would also like to thank Doc Edge for helpful statistical  
327 advice, and Matt Osmond, Erin Calfee, and Sivan Yair for helpful discussions. This research was  
328 supported by an NSF Graduate Research Fellowship grant awarded to VB (1650042), and NIH  
329 (R01-GM108779) and NSF (1353380) awarded to GC.

## 330 References

- 331 Andersen, Erik C et al. (2012). "Chromosome-scale selective sweeps shape *Caenorhabditis elegans*  
332 genomic diversity". en. In: *Nat. Genet.* 44.3, pp. 285–290.
- 333 Andolfatto, Peter (2007). "Hitchhiking effects of recurrent beneficial amino acid substitutions in  
334 the *Drosophila melanogaster* genome". en. In: *Genome Res.* 17.12, pp. 1755–1762.
- 335 Baldwin-Brown, J G, A D Long, and K R Thornton (2014). "The Power to Detect Quantitative Trait  
336 Loci Using Resequenced, Experimentally Evolved Populations of Diploid, Sexual Organisms".  
337 In: *Mol. Biol. Evol.* 31.4, pp. 1040–1055.
- 338 Barghi, Neda et al. (2019). "Genetic redundancy fuels polygenic adaptation in *Drosophila*". en. In:  
339 *PLoS Biol.* 17.2, e3000128.
- 340 Barton, N H (2000). "Genetic hitchhiking". In: *Proceedings of the Royal Society of London B:  
341 Biological Sciences* 355.1403, pp. 1553–1562.

- 342 Baym, Michael et al. (2016). “Spatiotemporal microbial evolution on antibiotic landscapes”. en. In:  
343 *Science* 353.6304, pp. 1147–1151.
- 344 Begun, David J et al. (2007). “Population genomics: whole-genome analysis of polymorphism and  
345 divergence in *Drosophila simulans*”. en. In: *PLoS Biol.* 5.11, e310.
- 346 Beissinger, Timothy M et al. (2016). “Recent demography drives changes in linked selection across  
347 the maize genome”. en. In: *Nat Plants* 2, p. 16084.
- 348 Benjamini, Yoav and Yosef Hochberg (1995). “Controlling the False Discovery Rate: A Practical  
349 and Powerful Approach to Multiple Testing”. In: *J. R. Stat. Soc. Series B Stat. Methodol.* 57.1,  
350 pp. 289–300.
- 351 Bennett, A F, K M Dao, and R E Lenski (1990). “Rapid evolution in response to high-temperature  
352 selection”. en. In: *Nature* 346.6279, pp. 79–81.
- 353 Bergland, Alan O, Emily L Behrman, Katherine R O’Brien, Paul S Schmidt, and Dmitri A Petrov  
354 (2014). “Genomic Evidence of Rapid and Stable Adaptive Oscillations over Seasonal Time Scales  
355 in *Drosophila*”. In: *PLoS Genet.* 10.11, e1004775–19.
- 356 Bhatia, Gaurav, Nick Patterson, Sriram Sankararaman, and Alkes L Price (2013). “Estimating and  
357 interpreting FST: the impact of rare variants”. en. In: *Genome Res.* 23.9, pp. 1514–1521.
- 358 Buffalo, Vince and Graham Coop (2019). “The Linked Selection Signature of Rapid Adaptation in  
359 Temporal Genomic Data”. en.
- 360 Burke, Molly K et al. (2010). “Genome-wide analysis of a long-term evolution experiment with  
361 *Drosophila*”. In: *Nature* 467.7315, pp. 587–590.
- 362 Castro, João Pl et al. (2019). “An integrative genomic analysis of the Longshanks selection exper-  
363 iment for longer limbs in mice”. en. In: *Elife* 8.
- 364 Charlesworth, Brian, M T Morgan, and D Charlesworth (1993). “The effect of deleterious mutations  
365 on neutral molecular variation”. In: *Genetics* 134.4, pp. 1289–1303.
- 366 Comeron, Josep M (2014). “Background selection as baseline for nucleotide variation across the  
367 *Drosophila* genome”. en. In: *PLoS Genet.* 10.6, e1004434.
- 368 Coop, Graham (2016). *Does linked selection explain the narrow range of genetic diversity across*  
369 *species?* Tech. rep. Cold Spring Harbor Labs Journals.
- 370 Corbett-Detig, Russell B, Daniel L Hartl, and Timothy B Sackton (2015). “Natural Selection Con-  
371 strains Neutral Diversity across A Wide Range of Species”. In: *PLoS Biol.* 13.4, e1002112–25.
- 372 Cutter, A D and J Y Choi (2010). “Natural selection shapes nucleotide polymorphism across the  
373 genome of the nematode *Caenorhabditis briggsae*”. In: *Genome Res.* 20.8, pp. 1103–1111.
- 374 Cutter, Asher D and Bret A Payseur (2013). “Genomic signatures of selection at linked sites:  
375 unifying the disparity among species”. In: *Nature Publishing Group* 14.4, pp. 262–274.
- 376 Davison, A C and D V Hinkley (2013). *Bootstrap Methods and Their Application*. New York, NY,  
377 USA: Cambridge University Press.
- 378 Elyashiv, Eyal et al. (2016). “A Genomic Map of the Effects of Linked Selection in *Drosophila*”. In:  
379 *PLoS Genet.* 12.8, e1006130–24.
- 380 Franks, Steven J, Sheina Sim, and Arthur E Weis (2007). “Rapid evolution of flowering time by an  
381 annual plant in response to a climate fluctuation”. In: *Proceedings of the National Academy of*  
382 *Sciences* 104.4, pp. 1278–1282.
- 383 Good, Benjamin H, Michael J McDonald, Jeffrey E Barrick, Richard E Lenski, and Michael M  
384 Desai (2017). “The dynamics of molecular evolution over 60,000 generations”. en. In: *Nature*  
385 551.7678, pp. 45–50.

- 386 Grant, Peter R and B Rosemary Grant (2006). “Evolution of Character Displacement in Darwin’s  
387 Finches”. In: *Science* 313.5784, pp. 224–226.
- 388 — (2011). “Causes of lifetime fitness of Darwin’s finches in a fluctuating environment”. en. In: *Proc.*  
389 *Natl. Acad. Sci. U. S. A.* 108.2, pp. 674–679.
- 390 Hairston Jr, Nelson G, Stephen P Ellner, Monica A Geber, Takehito Yoshida, and Jennifer A Fox  
391 (2005). “Rapid evolution and the convergence of ecological and evolutionary time”. In: *Ecol.*  
392 *Lett.* 8.10, pp. 1114–1127.
- 393 Hendry, A P and M T Kinnison (1999). “Perspective: the pace of modern life: measuring rates of  
394 contemporary microevolution”. In: *Evolution* 53.6, p. 1637.
- 395 Hernandez, R D, J L Kelley, E Elyashiv, and S C Melton (2011). “Classic selective sweeps were  
396 rare in recent human evolution”. In: *Science*.
- 397 Howie, James Malcolm, Rupert Mazzucco, Thomas Taus, Viola Nolte, and Christian Schlotterer  
398 (2018). “DNA motifs are not general predictors of recombination in two *Drosophila* sister  
399 species”. en.
- 400 Jónás, Á, T Taus, C Kosiol, and C Schlötterer (2016). “Estimating the Effective Population Size  
401 from Temporal Allele Frequency Changes in Experimental Evolution”. In: *Genetics*.
- 402 Kelly, John K and Kimberly A Hughes (2019). “Pervasive Linked Selection and Intermediate-  
403 Frequency Alleles Are Implicated in an Evolve-and-Resequencing Experiment of *Drosophila*  
404 *simulans*”. en. In: *Genetics* 211.3, pp. 943–961.
- 405 Kolaczkowski, Bryan, Andrew D Kern, Alisha K Holloway, and David J Begun (2011). “Ge-  
406 nomic differentiation between temperate and tropical Australian populations of *Drosophila*  
407 *melanogaster*”. en. In: *Genetics* 187.1, pp. 245–260.
- 408 Machado, Heather E et al. (2018). “Broad geographic sampling reveals predictable and pervasive  
409 seasonal adaptation in *Drosophila*”. en.
- 410 Macpherson, J Michael, Guy Sella, Jerel C Davis, and Dmitri A Petrov (2007). “Genomewide  
411 spatial correspondence between nonsynonymous divergence and neutral polymorphism reveals  
412 extensive adaptation in *Drosophila*”. en. In: *Genetics* 177.4, pp. 2083–2099.
- 413 Marchini, Marta et al. (2014). “Impacts of genetic correlation on the independent evolution of body  
414 mass and skeletal size in mammals”. en. In: *BMC Evol. Biol.* 14, p. 258.
- 415 Maynard Smith, John and John Haigh (1974). “The hitch-hiking effect of a favourable gene”. In:  
416 *Genet. Res.* 23.01, pp. 23–35.
- 417 McVicker, Graham, David Gordon, Colleen Davis, and Phil Green (2009). “Widespread Genomic  
418 Signatures of Natural Selection in Hominid Evolution”. In: *PLoS Genet.* 5.5, e1000471–16.
- 419 Nei, Masatoshi and Fumio Tajima (1981). “Genetic Drift And Estimation Of Effective Population  
420 Size”. In: *Genetics* 98.3, pp. 625–640.
- 421 Nordborg, Magnus, Brian Charlesworth, and Deborah Charlesworth (1996). “The effect of recom-  
422 bination on background selection\*”. In: *Genet. Res.* 67.02, pp. 159–174.
- 423 Nordborg, Magnus et al. (2005). “The Pattern of Polymorphism in *Arabidopsis thaliana*”. In: *PLoS*  
424 *Biol.* 3.7, e196–11.
- 425 Nuzhdin, Sergey V and Thomas L Turner (2013). “Promises and limitations of hitchhiking map-  
426 ping”. en. In: *Curr. Opin. Genet. Dev.* 23.6, pp. 694–699.
- 427 Reznick, David N, Frank H Shaw, F Helen Rodd, and Ruth G Shaw (1997). “Evaluation of the  
428 Rate of Evolution in Natural Populations of Guppies (*Poecilia reticulata*)”. In: *Science* 275.5308,  
429 pp. 1934–1937.

- 430 Robertson, Alan (1961). “Inbreeding in artificial selection programmes”. In: *Genet. Res.* 2.02,  
431 pp. 189–194.
- 432 Santiago, Enrique and Armando Caballero (1995). “Effective size of populations under selection”.  
433 In: *Genetics* 139.2, pp. 1013–1030.
- 434 — (1998). “Effective Size and Polymorphism of Linked Neutral Loci in Populations Under Direc-  
435 tional Selection”. In: *Genetics* 149.4, pp. 2105–2117.
- 436 Sattath, Shmuel, Eyal Elyashiv, Oren Kolodny, Yosef Rinott, and Guy Sella (2011). “Pervasive  
437 adaptive protein evolution apparent in diversity patterns around amino acid substitutions in  
438 *Drosophila simulans*”. en. In: *PLoS Genet.* 7.2, e1001302.
- 439 Sella, Guy, Dmitri A Petrov, Molly Przeworski, and Peter Andolfatto (2009). “Pervasive natural  
440 selection in the *Drosophila* genome?” en. In: *PLoS Genet.* 5.6, e1000495.
- 441 Signor, Sarah A, Felicia N New, and Sergey Nuzhdin (2018). “A Large Panel of *Drosophila simulans*  
442 Reveals an Abundance of Common Variants”. en. In: *Genome Biol. Evol.* 10.1, pp. 189–206.
- 443 Therkildsen, Nina O et al. (2019). “Contrasting genomic shifts underlie parallel phenotypic evolu-  
444 tion in response to fishing”. en. In: *Science* 365.6452, pp. 487–490.
- 445 Turner, T L and P M Miller (2012). “Investigating Natural Variation in *Drosophila* Courtship Song  
446 by the Evolve and Resequencing Approach”. In: *Genetics* 191.2, pp. 633–642.
- 447 Turner, Thomas L, Andrew D Stewart, Andrew T Fields, William R Rice, and Aaron M Tarone  
448 (2011). “Population-Based Resequencing of Experimentally Evolved Populations Reveals the  
449 Genetic Basis of Body Size Variation in *Drosophila melanogaster*”. In: *PLoS Genet.* 7.3, e1001336–  
450 10.
- 451 Waples, R S (1989). “A generalized approach for estimating effective population size from temporal  
452 changes in allele frequency”. In: *Genetics* 121.2, pp. 379–391.
- 453 Wasserman, Larry (2006). *All of Nonparametric Statistics*. en. Springer Science & Business Media.
- 454 Williamson, Robert J et al. (2014). “Evidence for widespread positive and negative selection in  
455 coding and conserved noncoding regions of *Capsella grandiflora*”. en. In: *PLoS Genet.* 10.9,  
456 e1004622.
- 457 Woolliams, J A, N R Wray, and R Thompson (1993). “Prediction of long-term contributions and  
458 inbreeding in populations undergoing mass selection”. In: *Genet. Res.* 62.3, pp. 231–242.
- 459 Wray, Naomi R and Robin Thompson (1990). “Prediction of rates of inbreeding in selected popu-  
460 lations”. In: *Genet. Res.* 55.01, pp. 41–54.

## 461 **Supplementary Material**

### 462 **1.1 Estimator Bias Correction**

#### 463 **1.1.1 Correcting variance bias with a single depth sampling process**

464 Following Waples (1989), we have that the variance in allele frequency change at a locus in the  
465 initial generation, which is entirely due to the binomial sampling process, is  $\text{Var}(p_0) = p_0(1-p_0)/d_0$   
466 where  $d_0$  is the number of binomial draws (e.g. read depth). At a later timepoint, the variance in  
467 allele frequency is a result of both the binomial sampling process at time  $t$  and the evolutionary  
468 process. Using the law of total variation we can partition the variation from each process,



$$\text{Var}(\tilde{p}_t) = \mathbb{E}(\text{Var}(\tilde{p}_t|p_t)) + \text{Var}(\mathbb{E}(\tilde{p}_t|p_t)) \quad (3)$$

$$= \underbrace{\frac{p_t(1-p_t)}{d_t}}_{\text{generation } t \text{ sampling noise}} + \underbrace{\text{Var}(p_t)}_{\text{variance due to evolutionary process}}. \quad (4)$$

469 Under a drift-only process,  $\text{Var}(p_t) = p_0(1-p_0) \left[1 - \left(1 - \frac{1}{2N}\right)^t\right]$ . However, with heritable  
 470 variation in fitness, we need to consider the covariance in allele frequency changes across generations  
 471 (Buffalo and Coop 2019). We can write

$$\text{Var}(p_t) = \text{Var}(p_0 + (p_1 - p_0) + (p_2 - p_1) + \dots + (p_t - p_{t-1})) \quad (5)$$

$$= \text{Var}(p_0 + \Delta p_0 + \Delta p_1 + \dots + \Delta p_{t-1}) \quad (6)$$

$$= \text{Var}(p_0) + \sum_{i=0}^{t-1} \text{Cov}(p_0, \Delta p_i) + \sum_{i=0}^{t-1} \text{Var}(\Delta p_i) + \sum_{0 \leq i < j}^{t-1} \text{Cov}(\Delta p_i, \Delta p_j). \quad (7)$$

472 Each allele frequency change is equally like to be positive as it is to be negative; thus by  
 473 symmetry this second term is zero. Additionally  $\text{Var}(p_0) = 0$ , as we treat  $p_0$  as a fixed initial  
 474 frequency. We can write,

$$\text{Var}(p_t) = \sum_{i=0}^{t-1} \text{Var}(\Delta p_i) + \sum_{0 \leq i < j}^{t-1} \text{Cov}(\Delta p_i, \Delta p_j). \quad (8)$$

475 The second term, the cumulative impact of variance in allele frequency change can be partitioned  
 476 into heritable fitness and drift components (Buffalo and Coop 2019; Santiago and Caballero 1995)

$$\text{Var}(p_t) = \sum_{i=0}^{t-1} \text{Var}(\Delta_D p_i) + \sum_{i=0}^{t-1} \text{Var}(\Delta_H p_i) + \sum_{0 \leq i < j}^{t-1} \text{Cov}(\Delta p_i, \Delta p_j). \quad (9)$$

477 where  $\Delta_H p_t$  and  $\Delta_D p_t$  indicate the allele frequency change due to heritable fitness variation and  
 478 drift respectively. Then, sum of drift variances in allele frequency change is

$$\sum_{i=0}^{t-1} \text{Var}(\Delta_D p_i) = \sum_{i=0}^{t-1} \frac{p_i(1-p_i)}{2N} \quad (10)$$

479 replacing the heterozygosity in generation  $i$  with its expectation, we have

$$\sum_{i=0}^{t-1} \text{Var}(\Delta_D p_i) = p_0(1-p_0) \sum_{i=0}^{t-1} \frac{1}{2N} \left(1 - \frac{1}{2N}\right)^i \quad (11)$$

$$= p_0(1-p_0) \left[1 - \left(1 - \frac{1}{2N}\right)^t\right] \quad (12)$$

480 which is the usual variance in allele frequency change due to drift. Then, the total allele frequency  
 481 change from generations 0 to  $t$  is  $\text{Var}(\tilde{p}_t - \tilde{p}_0) = \text{Var}(\tilde{p}_t) + \text{Var}(\tilde{p}_0) - 2\text{Cov}(\tilde{p}_t, \tilde{p}_0)$ , where the  
 482 covariance depends on the nature of the sampling plan (see Nei and Tajima 1981; Waples 1989).  
 483 In the case where there is heritable variation for fitness, and using the fact that  $\text{Cov}(\tilde{p}_t, \tilde{p}_0) =$   
 484  $p_0(1-p_0)/2N$  for Plan I sampling procedures (Waples 1989), we write,

$$\text{Var}(\tilde{p}_t - \tilde{p}_0) = \text{Var}(\tilde{p}_t) + \text{Var}(\tilde{p}_0) - 2C \text{Cov}(\tilde{p}_t, \tilde{p}_0) \quad (13)$$

$$= \frac{p_t(1-p_t)}{d_t} + \frac{p_0(1-p_0)}{d_0} + p_0(1-p_0) \left[ 1 - \left(1 - \frac{1}{2N}\right)^t \right] + \quad (14)$$

$$\sum_{i=0}^{t-1} \text{Var}(\Delta_H p_i) + \sum_{0 \leq i < j}^{t-1} \text{Cov}(\Delta p_i, \Delta p_j) - \frac{C p_0(1-p_0)}{2N} \quad (15)$$

$$\frac{\text{Var}(\tilde{p}_t - \tilde{p}_0)}{p_0(1-p_0)} = 1 + \frac{p_t(1-p_t)}{p_0(1-p_0)d_t} + \frac{1}{d_0} - \left(1 - \frac{1}{2N}\right)^t + \quad (16)$$

$$\sum_{i=0}^{t-1} \frac{\text{Var}(\Delta_H p_i)}{p_0(1-p_0)} + \sum_{0 \leq i < j}^{t-1} \frac{\text{Cov}(\Delta p_i, \Delta p_j)}{p_0(1-p_0)} - \frac{C}{N} \quad (17)$$

485 where  $C = 1$  if Plan I is used, and  $C = 0$  if Plan II is used (see Waples 1989, p. 380 and Figure  
 486 1 for a description of these sampling procedures; throughout the paper we use sampling Plan II).  
 487 Rearranging, we can create a bias-corrected estimator for the population variance in allele frequency  
 488 change, and replace all population heterozygosity terms with the unbiased sample estimators, e.g.  
 489  $\frac{d_t}{d_t-1} \tilde{p}_t(1-\tilde{p}_t)$ ,

$$\frac{d_0-1}{d_0} \frac{\text{Var}(\tilde{p}_1 - \tilde{p}_0)}{\tilde{p}_0(1-\tilde{p}_0)} - \frac{(d_0-1)}{d_0(d_1-1)} \frac{\tilde{p}_1(1-\tilde{p}_1)}{\tilde{p}_0(1-\tilde{p}_0)} - \frac{1}{d_0} + \frac{C}{N} = \frac{\text{Var}(\Delta_H p_0)}{p_0(1-p_0)} + \frac{1}{2N} \quad (18)$$

### 490 1.1.2 Correcting variance bias with individual and depth sampling processes

491 Here, we extend the sampling bias correction described above to handle two binomial sampling  
 492 processes: one as individuals are binomially sampled from the population, and another as reads  
 493 are binomially sampled during sequencing. (see also Jónás et al. 2016). Let  $X_t \sim \text{Binom}(n_t, p_t)$   
 494 where  $X_t$  is the count of alleles and  $n_t$  is the number of diploids sampled at time  $t$ . Then, these  
 495 individuals are sequenced at a depth of  $d_t$ , and  $Y_t \sim \text{Binom}(d_t, X_t/n_t)$  reads have the tracked allele.  
 496 We let  $\tilde{p}_t = Y_t/d_t$  be the observed sample allele frequency. Then, the sampling noise is

$$\text{Var}(\tilde{p}_t | p_t) = \mathbb{E}(\text{Var}(\tilde{p}_t | X_t)) + \text{Var}(\mathbb{E}(\tilde{p}_t | X_t)) \quad (19)$$

$$= p_t(1-p_t) \left( \frac{1}{n_t} + \frac{1}{d_t} - \frac{1}{n_t d_t} \right) \quad (20)$$

$$\text{Var}(\tilde{p}_t - \tilde{p}_0) = p_t(1 - p_t) \left( \frac{1}{n_t} + \frac{1}{d_t} - \frac{1}{n_t d_t} \right) + p_0(1 - p_0) \left( \frac{1}{n_0} + \frac{1}{d_0} - \frac{1}{n_0 d_0} \right) \quad (21)$$

$$- \frac{C p_0(1 - p_0)}{N} + p_0(1 - p_0) \left[ 1 - \left( 1 - \frac{1}{2N} \right)^t \right] + \sum_{i=0}^{t-1} \text{Var}(\Delta_H p_i) \quad (22)$$

$$+ \sum_{0 \leq i < j}^{t-1} \text{Cov}(\Delta p_i, \Delta p_j) \quad (23)$$

497 Through the law of total expectation (see Kolaczowski et al. 2011 Supplementary File 1 for a  
498 sample proof), one can find that an unbiased estimator of the half the heterozygosity is

$$\frac{n_t d_t}{(n_t - 1)(d_t - 1)} \tilde{p}_t(1 - \tilde{p}_t). \quad (24)$$

499 Replacing this unbiased estimator for half of the heterozygosity into our expression above, the total  
500 sample variance is

$$\begin{aligned} \text{Var}(\tilde{p}_t - \tilde{p}_0) = & \frac{n_t d_t \tilde{p}_t(1 - \tilde{p}_t)}{(n_t - 1)(d_t - 1)} \left( \frac{1}{n_t} + \frac{1}{d_t} - \frac{1}{n_t d_t} \right) + \frac{n_0 d_0 \tilde{p}_0(1 - \tilde{p}_0)}{(n_0 - 1)(d_0 - 1)} \left( \frac{1}{n_0} + \frac{1}{d_0} - \frac{1}{n_0 d_0} \right) + \quad (25) \\ & \frac{n_0 d_0 \tilde{p}_0(1 - \tilde{p}_0)}{(n_0 - 1)(d_0 - 1)} \left[ 1 - \left( 1 - \frac{1}{2N} \right)^t \right] - \frac{C}{N} \frac{n_0 d_0 \tilde{p}_0(1 - \tilde{p}_0)}{(n_0 - 1)(d_0 - 1)} + \\ & \sum_{i=0}^{t-1} \text{Var}(\Delta_H p_i) + \sum_{0 \leq i < j}^{t-1} \text{Cov}(\Delta p_i, \Delta p_j). \end{aligned} \quad (26)$$

501 As with equation (18), we can rearrange this to get a biased-corrected estimate of the variance in  
502 allele frequency change between adjacent generations,  $\text{Var}(\Delta p_t)$ .

### 503 1.1.3 Covariance Correction

504 We also need to apply a bias correction to the temporal covariances (and possibly the replicate co-  
505 variances if the initial sample frequencies are all shared). The basic issue is that  $\text{Cov}(\Delta \tilde{p}_t, \Delta \tilde{p}_{t+1}) =$   
506  $\text{Cov}(\tilde{p}_{t+1} - \tilde{p}_t, \tilde{p}_{t+2} - \tilde{p}_{t+1})$ , and thus shares the sampling noise of timepoint  $t + 1$ . Thus acts to bias  
507 the covariance by subtracting off the noise variance term of  $\text{Var}(\tilde{p}_{t+1})$ , so we add the expectation  
508 of this bias, derived above, back in. We discuss this in more detail below in deriving the bias  
509 correction for the temporal-replicate variance covariance matrix.

### 510 1.1.4 Temporal-Replicate Covariance Matrix Correction

511 In practice, we simultaneously estimate the temporal and replicate covariance matrices for each  
512 replicate, which we call the temporal-replicate covariance matrix. This needs a bias correction; we  
513 extend the bias corrections for single locus variance and covariance described in Supplementary

514 Material Sections 1.1.1, 1.1.2, and 1.1.3 to multiple sampled loci and the temporal-replicate covari-  
 515 ance matrix here. With frequency data collected at  $T + 1$  timepoints across  $R$  replicate populations  
 516 at  $L$  loci, we have multidimensional arrays  $\mathbf{F}$  of allele frequencies,  $\mathbf{D}$  of sequencing depths, and  $\mathbf{N}$   
 517 of the number of individuals sequenced, each of dimension  $R \times (T + 1) \times L$ . We calculate the array  
 518  $\Delta\mathbf{F}$  which contains the allele frequency changes between adjacent generations, and has dimension  
 519  $R \times T \times L$ . The operation  $\text{flat}(\Delta\mathbf{F})$  flattens this array to a  $(R \cdot T) \times L$  matrix, such that rows are  
 520 grouped by replicate, e.g. for timepoint  $t$ , replicate  $r$ , and locus  $l$  such that for allele frequencies  
 521  $p_{t,r,l}$ , the frequency change entries are

$$\text{flat}(\Delta\mathbf{F}) = \begin{bmatrix} \Delta p_{1,0,0} & \Delta p_{2,0,0} & \cdots & \Delta p_{1,1,0} & \Delta p_{2,1,0} & \cdots & \Delta p_{T,R,0} \\ \Delta p_{1,0,1} & \Delta p_{2,0,1} & \cdots & \Delta p_{1,1,1} & \Delta p_{2,1,1} & \cdots & \Delta p_{T,R,1} \\ \vdots & \vdots & \ddots & \vdots & \vdots & \ddots & \vdots \\ \Delta p_{1,0,L} & \Delta p_{2,0,L} & \cdots & \Delta p_{1,1,L} & \Delta p_{2,1,L} & \cdots & \Delta p_{T,R,L} \end{bmatrix} \quad (27)$$

522 where each  $\Delta p_{t,r,l} = p_{t+1,r,l} - p_{t,r,l}$ . Then, the sample temporal-replicate covariance matrix  $\mathbf{Q}'$   
 523 calculated on  $\text{flat}(\Delta\mathbf{F})$  is a  $(R \cdot T) \times (R \cdot T)$  matrix, with the  $R$  temporal-covariance block submatrices  
 524 along the diagonal, and the  $R(R - 1)$  replicate-covariance submatrices matrices in the upper and  
 525 lower triangles of the matrix,

$$\mathbf{Q}' = \begin{bmatrix} \mathbf{Q}'_{1,1} & \mathbf{Q}'_{1,2} & \cdots & \mathbf{Q}'_{1,R} \\ \mathbf{Q}'_{2,1} & \mathbf{Q}'_{2,2} & \cdots & \mathbf{Q}'_{2,R} \\ \vdots & \vdots & \ddots & \vdots \\ \mathbf{Q}'_{R,1} & \mathbf{Q}'_{R,2} & \cdots & \mathbf{Q}'_{R,R} \end{bmatrix} \quad (28)$$

526 where each submatrix  $\mathbf{Q}'_{i,j}$  ( $i \neq j$ ) is the  $T \times T$  sample replicate covariance matrix for replicates  
 527  $i$  and  $j$ , and the submatrices along the diagonal  $\mathbf{Q}'_{r,r}$  are the temporal covariance matrices for  
 528 replicate  $r$ .

529 Given the bias of the sample covariance of allele frequency changes, we calculated an expected  
 530 bias matrix  $\mathbf{B}$ , averaging over loci,

$$\mathbf{B} = \frac{1}{L} \sum_{l=1}^L \frac{\mathbf{h}_l}{2} \circ \left( \frac{1}{\mathbf{d}_l} + \frac{1}{2\mathbf{n}_l} + \frac{1}{2\mathbf{d}_l \circ \mathbf{n}_l} \right) \quad (29)$$

531 where  $\circ$  denotes elementwise product, and  $\mathbf{h}_l$ ,  $\mathbf{d}_l$ , and  $\mathbf{n}_l$ , are rows corresponding to locus  $l$  of  
 532 the unbiased heterozygosity arrays  $\mathbf{H}$ , depth matrix  $\mathbf{D}$ , and number of diploids matrix  $\mathbf{N}$ . The  
 533 unbiased  $R \times (T + 1) \times L$  heterozygosity array can be calculated as

$$\mathbf{H} = \frac{2\mathbf{D} \circ \mathbf{N}}{(\mathbf{D} - 1) \circ (\mathbf{N} - 1)} \circ \mathbf{F} \circ (1 - \mathbf{F}) \quad (30)$$

534 where division here is elementwise. Thus,  $\mathbf{B}$  is a  $R \times (T + 1)$  matrix. As explained in Supplementary  
 535 Material Section 1.1.2 and 1.1.3, the temporal variances and covariances require bias corrections,  
 536 meaning each temporal covariance submatrix  $\mathbf{Q}_{r,r}$  requires two corrections. For an element  $Q_{r,t,s} =$

537  $\text{Cov}(\Delta p_t, \Delta p_s)$  of the temporal covariance submatrix for replicate  $r$ ,  $\mathbf{Q}_{r,r}$ , we apply the following  
538 correction

$$Q_{r,t,s} = \begin{cases} Q'_{r,t,s} - b_{r,t} - b_{r,t+1}, & \text{if } t = s \\ Q'_{r,t,s} + b_{r,\max(t,s)}, & \text{if } |t - s| = 1 \end{cases} \quad (31)$$

539 where  $b_{r,t}$  is element in row  $r$  and column  $t$  of  $\mathbf{B}$ .

### 540 1.1.5 Barghi et al. (2019) Temporal Covariances

541 Since each replicate population was sequenced every ten generations, the timepoints  $t_0 = 0$  genera-  
542 tions,  $t_1 = 10$  generations,  $t_2 = 20$  generations, etc., lead to observed allele frequency changes across  
543 ten generation blocks,  $\Delta p_{t_0}, \Delta p_{t_1}, \dots, \Delta p_{t_6}$ . Consequently, the ten temporal covariance matrices  
544 for each of the ten replicate populations have off-diagonal elements of the form  $\text{Cov}(\Delta p_{t_0}, \Delta p_{t_1}) =$   
545  $\text{Cov}(p_{t_1} - p_{t_0}, p_{t_2} - p_{t_1}) = \sum_{i=0}^{10} \sum_{j=10}^{20} \text{Cov}(\Delta p_i, \Delta p_j)$ . Each diagonal element has the form  $\text{Var}(\Delta p_{t_0}) =$   
546  $\sum_{i=0}^{t_0} \text{Var}(\Delta p_i) + \sum_{i \neq j}^{t_0} \text{Cov}(\Delta p_i, \Delta p_j)$ , and is thus a combination of the effects of drift and selec-  
547 tion, as both the variance in allele frequency changes and cumulative temporal autocovariances  
548 terms increase the variance in allele frequency. With sampling each generation, one could more  
549 accurately partition the total variance in allele frequency change (Buffalo and Coop 2019); while  
550 we cannot directly estimate the contribution of linked selection to the variance in allele frequency  
551 change here, the presence of a positive observed covariance between allele frequency change can  
552 only be caused linked selection.

## 553 1.2 Block Bootstrap Procedure

554 To infer the uncertainty of covariance, convergence correlation, and  $G(t)$  estimates, we used a  
555 block bootstrap procedure. This is a version of the bootstrap that resamples blocks of data points,  
556 rather than individual data points, to infer the uncertainty of an statistic in the presence of un-  
557 known correlation structure between data. With genome-wide data, linkage disequilibria between  
558 sites creates complex and unknown dependencies between variants. The estimators used in this  
559 paper are predominantly ratios, e.g. temporal-replicate covariance standardized by half the het-  
560 erozygosity,  $G(t)$  which is the ratio of covariance to total variance, and the convergence correlation  
561 (equation (2)). In these cases, we can exploit the linearity of the expectation to make the bootstrap  
562 procedure more computationally efficient, by pre-calculating the statistics of the ratio's numerator  
563 and denominator,  $N(\mathbf{x}_i)$  and  $D(\mathbf{x}_i)$ , on the data  $\mathbf{x}_i$  for all blocks  $i \in \{1, 2, \dots, W\}$  in the genome.  
564 Then we draw  $W$  bootstrap samples with replacement, and compute the estimate for bootstrap  
565 sample  $b$  with an average weighted by the fraction  $w_i$  of total loci contained in each block,

$$\tilde{\theta}_b = \frac{\sum_{i=1}^W w_i N(\mathbf{x}_i)}{\sum_{i=1}^W w_i D(\mathbf{x}_i)} \quad (32)$$

566 Note that computing the ratio of averages rather than the average of a ratio is a practice common  
567 for population genetic statistics like  $F_{ST}$  (Bhatia et al. 2013). With these  $B$  bootstrap estimates,  
568 we calculate the  $\alpha/2$  and  $1 - \alpha/2$  quantiles, which we use to estimate the  $1 - \alpha = 95\%$  pivot confidence  
569 intervals (p. 33 Wasserman 2006, p. 194 Davison and Hinkley 2013) throughout the paper,

$$C_\alpha = \left( 2\hat{\theta} - q_{1-\alpha/2}, 2\hat{\theta} - q_{\alpha/2} \right). \quad (33)$$

570 where  $\hat{\theta}$  is the estimate, and  $q_x$  is bootstrap quantile for probability  $x$ .

### 571 1.3 Replicate $G$ and Partitioning the Variance in Allele Frequency

572 We define a statistic similar to  $G$  for estimating the proportion of allele frequency change common  
 573 between two replicate populations due to linked selection. Covariance in allele frequency change  
 574 between two replicate populations is due to convergent selection pressure selecting haplotypes  
 575 shared between the two replicate populations, which acts to perturb linked neutral variation in  
 576 parallel way.

$$G_R(t) = \frac{\mathbb{E}_{A \neq B}(\sum_{i \neq j}^t \text{Cov}(\Delta p_{i,A}, \Delta p_{j,B}))}{\mathbb{E}_R(\text{Var}(p_{t,R} - p_{0,R}))} \quad (34)$$

577 where  $\mathbb{E}_{A \neq B}$  indicates that the expectation is taken over all ordered pairs of replicates (e.g. sum-  
 578 ming all off-diagonal elements replicate covariances), and  $\mathbb{E}_R$  indicates taking expectation over  
 579 all replicates. This measures the fraction of variance in allele frequency change (averaged across  
 580 replicates) due to shared selection pressure.

581 Extending our theoretic work in Buffalo and Coop (2019), we can partition the allele frequency  
 582 change in two replicates into drift, and shared selection and replicate-specific selection components  
 583 of allele frequency change. For two replicates,  $A$  and  $B$ ,

$$\Delta p_{t,A} = \Delta_D p_{t,A} + \Delta_U p_{t,A} + \Delta_S p_t \quad (35)$$

$$\Delta p_{t,B} = \Delta_D p_{t,B} + \Delta_U p_{t,B} + \Delta_S p_t \quad (36)$$

584 where  $\Delta_D p_{t,A}$  is allele frequency change due to drift (this is specific to a replicate, and equal to  
 585  $\Delta_N p_{t,A} + \Delta_M p_{t,A}$  in the notation of Buffalo and Coop 2019),  $\Delta_U p_{t,A}$  is the allele frequency change  
 586 from indirect selection specific to replicate  $A$  (and likewise with  $\Delta_U p_{t,A}$  for replicate  $B$ ), and  $\Delta_S p_t$   
 587 is the allele frequency change from indirect selection shared across the replicates  $A$  and  $B$  (this term  
 588 lacks a replicate subscript since by construction it is identical between replicates). By construction,  
 589 each of these terms is uncorrelated, so the variance can be written as:

$$\text{Var}(\Delta p_{t,A}) = \text{Var}(\Delta_D p_{t,A}) + \text{Var}(\Delta_U p_{t,A}) + \text{Var}(\Delta_S p_t) \quad (37)$$

$$(38)$$

590 The shared effects of indirect selection can be quantified from the observed allele frequency  
 591 changes, since the covariance in allele frequency change across replicates is the covariance of the  
 592 shared term by construction,

$$\text{Cov}(\Delta p_{t,A}, \Delta p_{t,B}) = \text{Cov}(\Delta_S p_t, \Delta_S p_t) = \text{Var}(\Delta_S p_t) \quad (39)$$



593 In artificial selection studies with a control (non-selected) line, such as the Castro et al. (2019)  
594 study, this allows us to estimate the contribution of the effects of shared and unique indirect  
595 selection. In the case of this study, we can estimate the drift, unique selection effect, and shared  
596 selection effect terms using the fact that,

$$\Delta p_{t,LS1} = \Delta_D p_{t,LS1} + \Delta_U p_{t,LS1} + \Delta_{LS} p_t \quad (40)$$

$$\Delta p_{t,LS2} = \Delta_D p_{t,LS2} + \Delta_U p_{t,LS2} + \Delta_{LS} p_t \quad (41)$$

$$\Delta p_{t,Ctrl} = \Delta_D p_{t,Ctrl}. \quad (42)$$

597 Note that since the control replicate does not undergo artificial selection, we assume that its  
598 allele frequency changes are determined entirely by genetic drift. With free mating individuals  
599 (such as in a cage population), this may not be the case, and sequencing adjacent generations  
600 would allow one to differentiate the effects of selection and drift.

601 We assume that we can approximate the contribution of genetic drift in the Longshanks se-  
602 lection lines with the observed variance in the control line, or  $\text{Var}(\Delta p_{t,Ctrl}) = \text{Var}(\Delta_{Dp_{t,LS1}}) =$   
603  $\text{Var}(\Delta_{Dp_{t,LS2}})$ . Then, the combined effects of selection can be estimated by averaging the variances  
604 of the two Longshanks selection lines, and subtracting the variance in allele frequency change in  
605 the control line, which we treat as driven by drift alone (since matings are random). Note that each  
606 variance is bias-corrected according to the methods described in Supplementary Materials 1.1.4,  
607 and the average sequencing depths between lines are nearly identical. Thus, we have

$$(\text{Var}(\Delta p_{t,LS1}) + \text{Var}(\Delta p_{t,LS2}))/2 - \text{Var}(\Delta p_{t,Ctrl}) = \overline{\text{Var}(\Delta_U p_{t,LS})} + \text{Var}(\Delta_{LS} p_t) \quad (43)$$

608 where the bar indicates values averaged both Longshanks selection lines. Additionally, use the fact  
609 that

$$\text{Cov}(\Delta p_{t,LS1}, \Delta p_{t,LS2}) = \text{Var}(\Delta_{LS} p_t) \quad (44)$$

610 we can also separate out the unique and shared components by subtracting off this covariance,

$$\overline{\text{Var}(\Delta_U p_{t,LS})} = (\text{Var}(\Delta p_{t,LS1}) + \text{Var}(\Delta p_{t,LS2}))/2 - \text{Var}(\Delta p_{t,Ctrl}) - \text{Cov}(\Delta p_{t,LS1}, \Delta p_{t,LS2}). \quad (45)$$

611 Finally, we can divide each of these values by the total variance to get the proportion of total  
612 variance drift, and unique and shared effects of selection contribute towards the total. To derive  
613 confidence intervals for the estimates of unique and shared effects of selection, we use a block  
614 bootstrap procedure as described in Supplementary Materials Section 1.2.

#### 615 1.4 The Empirical Neutral Null Windowed Covariance Distribution

616 To detect an excess of genomic regions with unusually high or low covariances, we need to compare  
617 the distribution of observed windowed covariances to a null distribution of windowed covariances  
618 that we would expect under no selection. While we could construct a theoretic sampling distribution  
619 of the spurious covariances created by neutral genetic drift at particular site, the unknown linkage

620 disequilibrium between sites would mean that this is not an adequate null model for the distribution  
621 of windowed covariances in our data.

622 To address this limitation, we construct a neutral null model by sign-permuting the observed  
623 allele frequency changes. This destroys the covariances built up by selection, mimicking a neutral  
624 allele's frequency trajectory. This approach is conservative, since selection also acts to increase  
625 the magnitude of allele frequency changes (see equation 1 of Buffalo and Coop 2019), but this  
626 magnitude is not affected by the sign-permutation procedure. Consequently, the resulting empirical  
627 null distribution has higher variance than would be expected under neutrality alone.

628 Still, we wanted to ensure that LD between sign-permuted blocks, which will affect the variance  
629 of the empirical null distribution, does not impact our primary finding that the distribution of  
630 temporal covariances becomes increasingly negative in the Barghi et al. (2019) dataset through  
631 time. To address this, we also sign-permuted at the whole chromosome level finding we recapitulate  
632 the same pattern (Supplementary Figure S12).

### 633 1.5 Bergland et al. (2014) Re-Analysis

634 We also applied our temporal covariance approach to Bergland et al. (2014), which found evidence  
635 of genome-wide fluctuating selection between Spring and Fall seasons across three years *Drosophila*  
636 *melanogaster*. As described in Buffalo and Coop (2019), if fluctuating selection pressure among  
637 time-periods are the dominant genome-wide pattern, we might expect positive covariances between  
638 like seasons changes (e.g. Spring 2010 to Fall 2010 and Spring 2011 to Fall 2011), and negative  
639 covariances between dislike seasonal changes (e.g. Fall 2009 to Spring 2010 and Fall 2010 to Spring  
640 2011). However, while we find temporal covariances that are non-zero, we find only weak support  
641 for a seasonal fluctuating model driving these covariances. In Supplementary Figure S1, we show  
642 the temporal covariances from varying reference generations, across seasonal transitions that are  
643 alike (e.g. the covariance between the allele frequency changes between Fall 2009 and Spring  
644 2009, and frequency changes between Fall 2010 and Spring 2010), and dislike (e.g. the covariance  
645 between the allele frequency change between Fall 2009 and Spring 2009, and the frequency changes  
646 between Spring 2010 and Fall 2009). The first row of temporal covariance matrix is consistent  
647 with fluctuating selection operating for two timepoints, as the first covariance is negative, and the  
648 second is positive, and later covariances are not statistically differentiable from zero (which could  
649 occur if LD and additive genetic variance decay). However, all other temporal covariances do not  
650 fit the pattern we would expect under genome-wide fluctuating selection.

651 We wanted to establish that our temporal-covariance matrix bias correction was working cor-  
652 rectly. We find that it corrects the relationship between depth and both variance and covariance  
653 (Supplementary Figure S4) as expected.

654 It is unclear how strong the fluctuations would have to be to generate a genome-wide average  
655 signal of fluctuating selection from temporal covariances. For example, many loci could still show  
656 a signal of fluctuating selection, but the average signal could be overwhelmed by other signals of  
657 other selection. To investigate whether there was a genome-wide excess of loci showing evidence  
658 of fluctuating selection we reanalyzed the data of (Bergland et al. 2014) using the same seasonal  
659 fluctuating model as the original paper. This model is a Binomial logit-linked GLM fit per-locus,  
660 where the frequencies are regressed on the Spring/Fall seasons are encoded as a dummy variable.  
661 We use the same binomial weighting procedure as Bergland et al. (2014), where the weights are  
662 determined by the effective number of chromosomes,  $N_{eff} = (2n_t d_t - 1)/(2n_t + d_t)$  ( $n_t$  and  $d_t$   
663 are the number of diploid individuals and the read depth at timepoint  $t$ , respectively). We fit

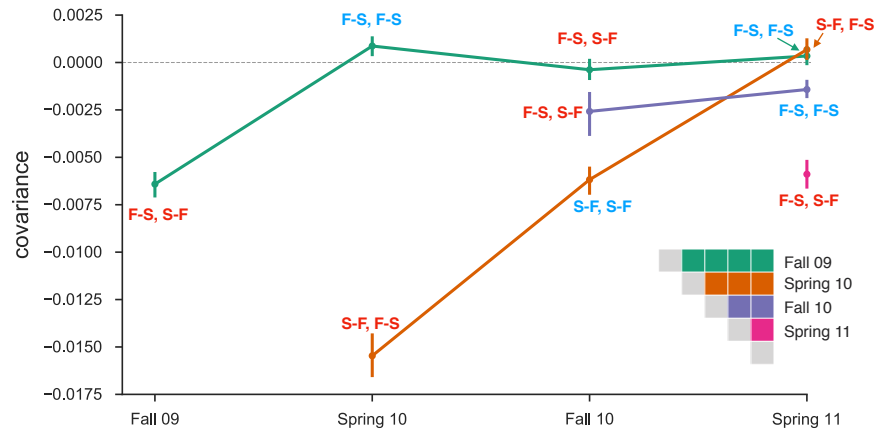

**Figure S1:** Temporal covariances from the Bergland et al. (2014) study, from varying reference generations (e.g. rows along the temporal covariance matrix). Each covariance is labeled indicating whether the covariance is between two like seasonal transitions (e.g. the covariance between allele frequency changes from fall to spring in one year, and fall to spring in another) or two dislike seasons (e.g. the covariance between fall to spring in one year, and spring to fall in another year). Covariances between like transitions are expected to be positive when there is a genome-wide effect of fluctuating selection (and these labels are colored blue), while covariances between dislike transitions are expected to be negative (and these labels are colored red). 95% confidence intervals were constructed by a block-bootstrapping procedure where the blocks are megabase tiles.

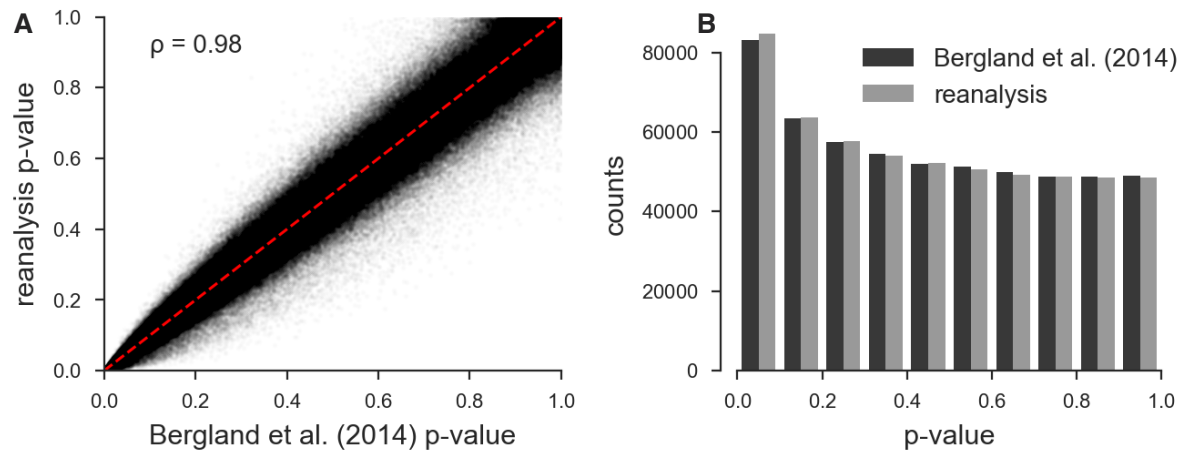

**Figure S2:** **A:** Scatterplot of the original unadjusted p-values from Bergland et al. (2014) and the p-values from our reanalysis of the same data using the same statistical methods; the minor discrepancy is likely due to software version differences. **B:** The histograms of the p-values of our reanalysis and the original Bergland et al. (2014) data; again the minor discrepancy is likely due to software differences. Overall, our implementation of Bergland et al.'s statistical methods produces results very close to the original analysis.

664 this model on all loci marked as used in the VCF provided with the Bergland et al. (2014) study  
665 (doi:10.5061/dryad.v883p). Overall, our p-values for the Wald test for each locus closely match  
666 those of the original paper (Pearson correlation coefficient 0.98, p-value  $< 2.2 \times 10^{-16}$ ; see Sup-  
667 plementary Figure S2 A), and the histograms of the p-values are nearly identical (Supplementary  
668 Figure S2 B). Bergland et al. (2014) find loci with a significant association with season after a  
669 Benjamini and Hochberg FDR p-value adjustment (Benjamini and Hochberg 1995), however, the  
670 null hypothesis of the Wald test does not give us an idea of the expected number of variants that  
671 may spuriously fit the pattern of seasonal fluctuating selection as it does not account for genetic  
672 drift or other forms of hitchhiking.

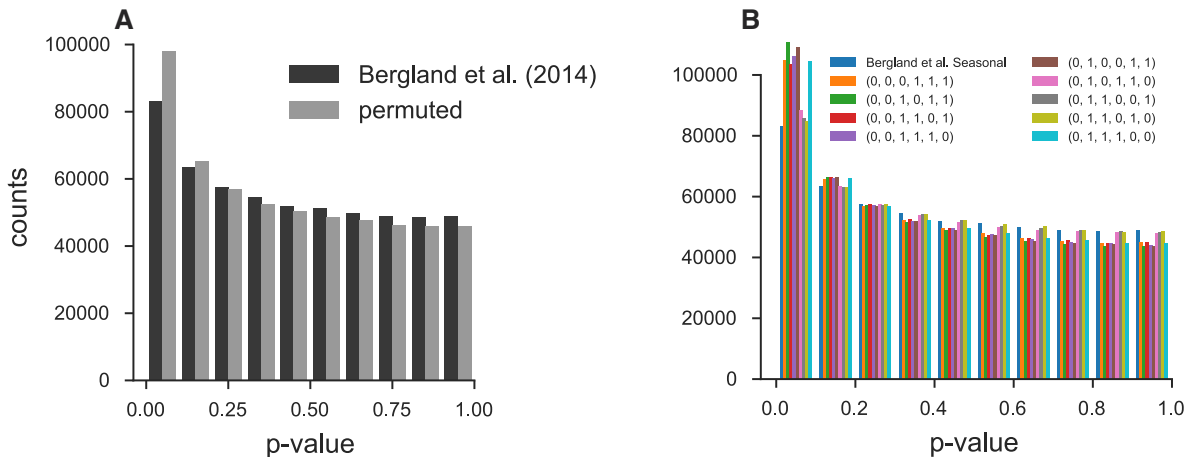

**Figure S3:** **A:** Histogram of original Bergland et al. (2014) seasonal p-values and p-values creating by randomly permuting the seasons at each locus. **B:** Histogram of original Bergland et al. (2014) p-values alongside all unique permutations (ignoring symmetries that lead to identical p-values).

673 To investigate whether there is a genome-wide evidence of an enrichment of fluctuating selection  
674 we created an empirical null distribution by randomly permuting the season labels and re-running  
675 the per-locus seasonal GLM model, as proposed by Machado et al. (2018). We find, regardless of  
676 whether we permute at the locus-level or the permutation replicate-level, that the observed seasonal  
677 p-value distribution Bergland et al. (2014) is not enriched for significant p-values beyond what we  
678 would expect from the permutation null. In fact, there appears there is more enrichment for low  
679 p-values when seasonal labels are randomly permuted (Supplementary Figure S3, suggesting by  
680 random chance we might expect more variants with a seasonal fluctuating pattern than found in  
681 the original Bergland et al. (2014) study. While surprising, this could be explained by the presence  
682 of temporal structure across the samples not consistent with seasonal fluctuating selection. Some  
683 fraction of the permutations happen to fit this structure well, leading to an enrichment of small  
684 p-values. This non-seasonal temporal structure is also evident in our temporal covariances (Sup-  
685 plementary Figure S1), where we see strong evidence of selection (non-zero temporal covariances),  
686 yet the pattern does not follow that of seasonal fluctuating selection.

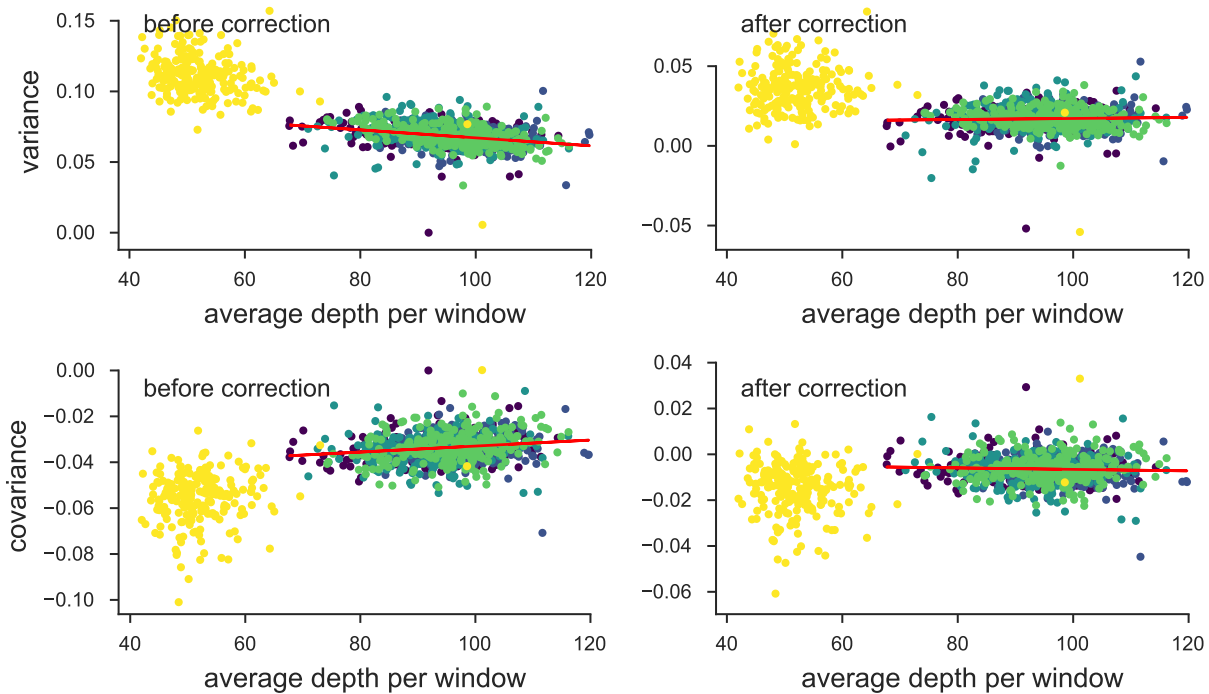

**Figure S4:** The variance and covariances from the Bergland et al. (2014) study, calculated in 100kb genomic windows plotted against average depth in a window before and after bias correction. Each panel has a least-squares estimate between the variance and covariance, and the average depth. The bias correction procedure is correcting sampling bias in both the variance and covariance such that the relationship with depth is constant. Colors indicate the different chromosomes of *D. melanogaster*; we have excluded the X chromosome (yellow points; chromosome 4 was not in the original study) from the regression due to large differences in average coverage.

## 687 Supplementary Figures

### 688 1.6 Bias Correction for Barghi et al. (2019)

689 We have investigated the effectiveness of our correction on real data by exploiting the relationship  
690 between sampling depth and the magnitude of the variance and covariance biases, and comparing  
691 the observed variances and covariances before and after correction. We plot the variance and  
692 covariance (between adjacent timepoints) before and after the bias correction against the average  
693 sample depth in 100kb genomic windows in Figure S5. Overall, we find the biased-correction  
694 procedure removes the relationship between variance and covariance and depth, indicating it is  
695 working adequately.

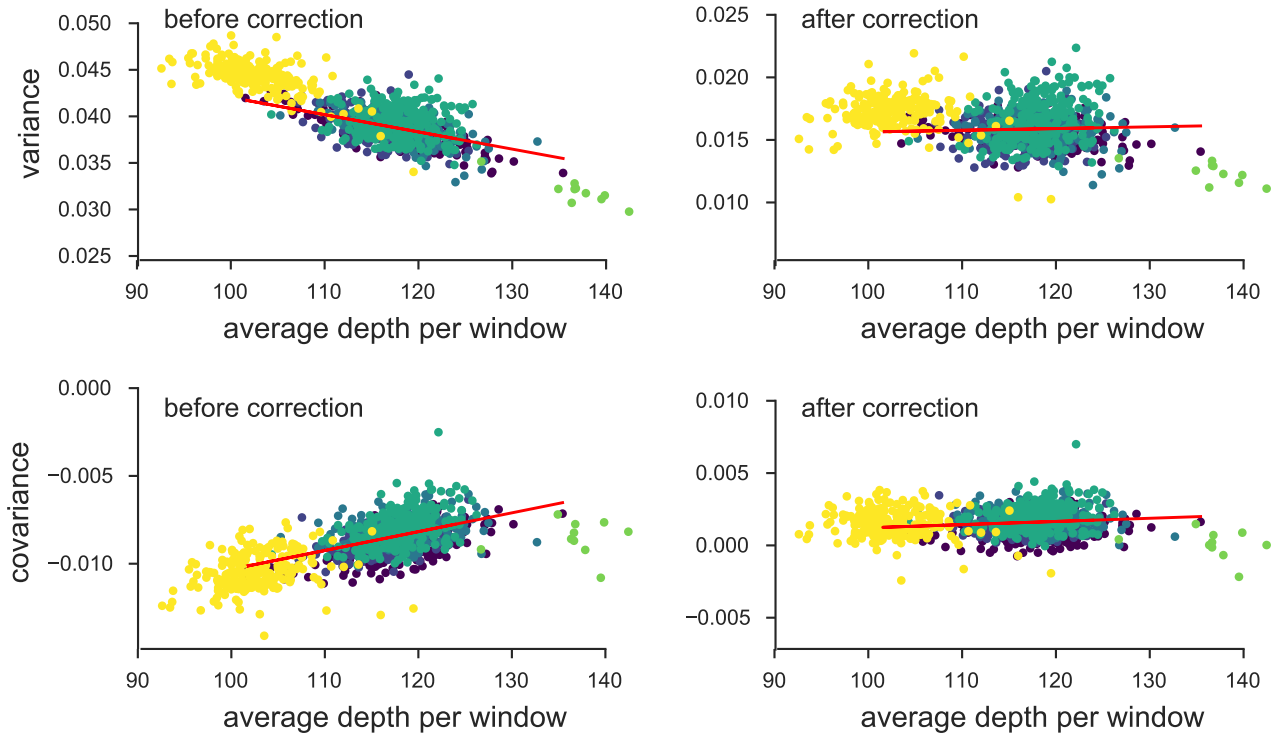

**Figure S5:** The variance and covariances from the Barghi et al. (2019) study, calculated in 100kb genomic windows plotted against average depth in a window before and after bias correction. Each panel has a least-squares estimate between the variance and covariance, and the average depth. Overall, the bias correction corrects sampling bias in both the variance and covariance such that the relationship with depth is constant. Colors indicate the different chromosomes of *D. simulans*; we have excluded the X chromosome (yellow points) and chromosome 4 points (green points to far right) from the regression due to large differences in average coverage.



696 1.6.1 Barghi et al. (2019) Temporal Covariances Per Replicate

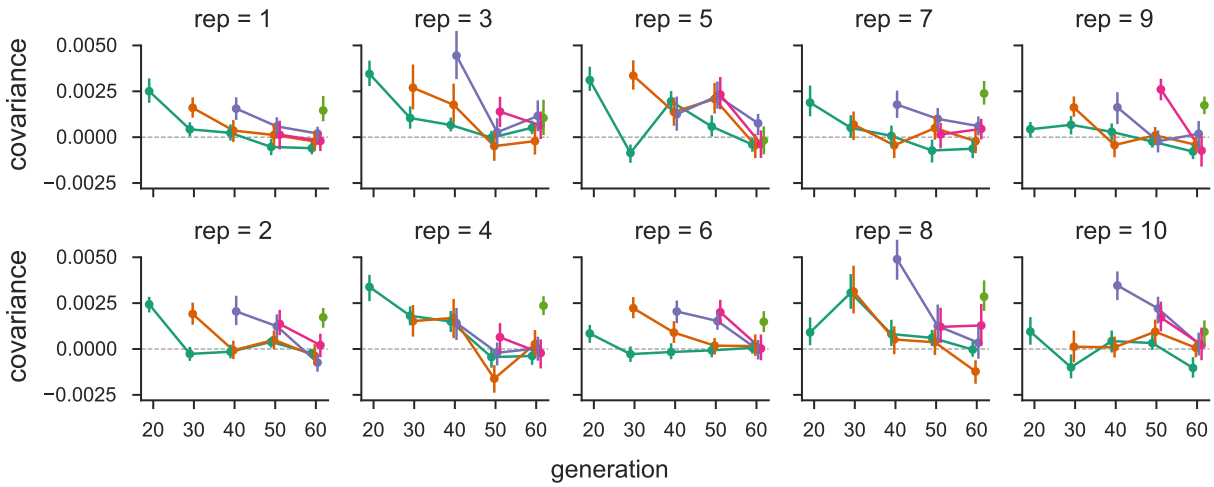

**Figure S6:** The temporal covariances from the Barghi et al. (2019) study, for each replicate individually. As in Figure 1, each line follows the temporal covariances from some initial reference generation through time, which represent the rows of temporal covariance matrix.

| s  | t  | median | median 95% CI    | trimmed mean | trimmed mean 95% CI |
|----|----|--------|------------------|--------------|---------------------|
| 0  | 10 | 1.629  | [1.532, 1.738]   | 1.874        | [1.777, 1.969]      |
| 0  | 20 | 0.371  | [0.276, 0.465]   | 0.491        | [0.403, 0.585]      |
| 0  | 30 | 0.479  | [0.4, 0.589]     | 0.516        | [0.434, 0.602]      |
| 0  | 40 | 0.059  | [-0.012, 0.15]   | 0.027        | [-0.05, 0.099]      |
| 0  | 50 | -0.204 | [-0.271, -0.125] | -0.259       | [-0.329, -0.187]    |
| 10 | 20 | 1.549  | [1.427, 1.659]   | 1.722        | [1.617, 1.83]       |
| 10 | 30 | 0.438  | [0.339, 0.539]   | 0.506        | [0.399, 0.609]      |
| 10 | 40 | 0.233  | [0.149, 0.328]   | 0.254        | [0.159, 0.343]      |
| 10 | 50 | -0.355 | [-0.454, -0.289] | -0.319       | [-0.401, -0.237]    |
| 20 | 30 | 1.981  | [1.856, 2.095]   | 2.195        | [2.084, 2.302]      |
| 20 | 40 | 0.792  | [0.698, 0.894]   | 0.903        | [0.815, 0.999]      |
| 20 | 50 | 0.123  | [0.042, 0.207]   | 0.221        | [0.141, 0.309]      |
| 30 | 40 | 1.296  | [1.208, 1.425]   | 1.385        | [1.287, 1.483]      |
| 30 | 50 | 0.07   | [-0.037, 0.183]  | 0.116        | [0.023, 0.21]       |
| 40 | 50 | 1.36   | [1.271, 1.446]   | 1.513        | [1.427, 1.601]      |

**Table S1:** Table of median of windowed covariance estimates ( $\text{Cov}(\Delta p_s, \Delta p_t) \times 100$ ) between generations  $t$  and  $s$  and the trimmed mean windowed covariance which excludes the lower and upper 5% windows with the highest covariance.

## 697 1.7 Barghi et al. (2019) Trimmed Window Covariances

698 Here we report median and trimmed mean of the windowed covariances (Supplementary Table S1).  
 699 We note that the median covariance is also limiting result of a trimmed mean that symmetrically  
 700 excludes the upper and lower  $\alpha$  tails to calculate the trimmed average windowed covariance. As  
 701  $\alpha$  increases to 0.5, the trimmed covariance converges to the median windowed covariance (by the  
 702 definition of the median; see Supplementary Figure S7). Thus our genomic temporal covariances  
 703 are non-zero due to the impact of selection on many genomic windows.

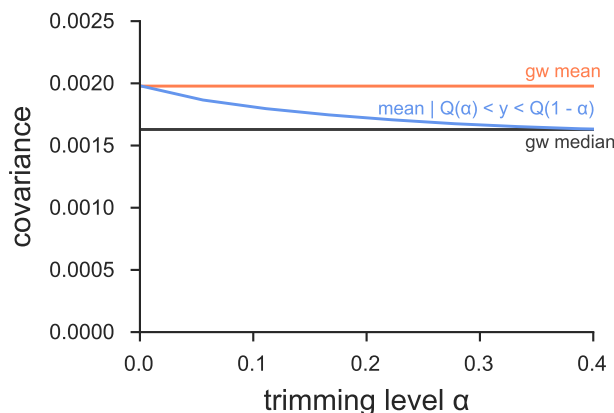

**Figure S7:** The genome-wide covariance ( $\text{Cov}(\Delta p_0, \Delta p_{10})$  pooling all replicates) averaged (red line) and the median windowed covariance (blue) for the Barghi et al. (2019) dataset. The trimmed average window covariance, excluding the  $\alpha$  lower and upper tails, converges to the median windowed covariance. This indicates that genome-wide covariance are not being overly dominated by a large-effect loci in few windows.

704 1.8 Barghi et al. (2019) Empirical Null and Windowed Covariance Distributions

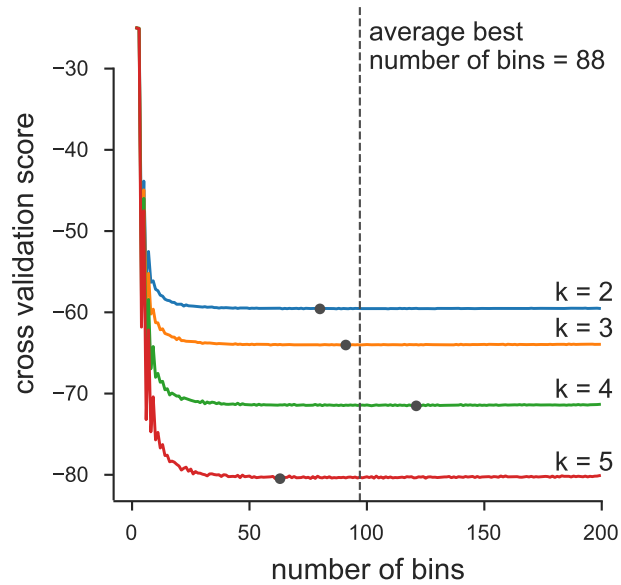

**Figure S8:** We chose number of bins used in the histograms of Figure 3 via an analytic expression for the cross-validation risk, based on the equation 6.16 of (Wasserman 2006, p. 129). Above, we plot the cross-validation risk for various numbers of bins, for each of the four off-diagonals of the temporal covariance matrix that we analyze. Overall, because the number of data points is large, oversmoothing is less of a problem, leading the cross-validation risk to be relatively flat across a large number of bins. Each gray point indicates the minimal risk for a particular off-diagonal, and the dashed line indicates the best average binwidth across off-diagonals.

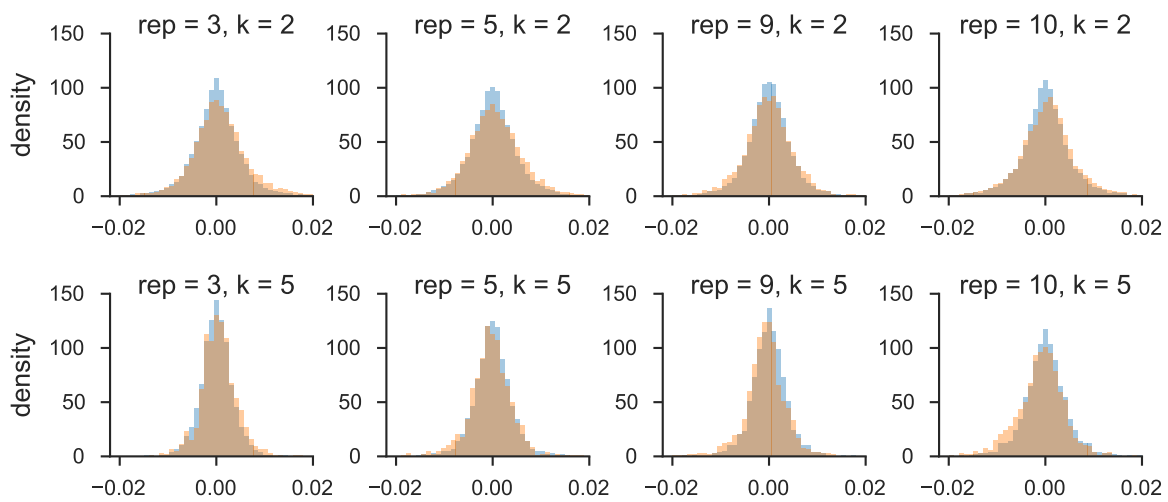

**Figure S9:** The distribution of windowed temporal covariances alongside the empirical neutral null for five randomly sampled replicates (columns), for  $k = 2$  (first row) and  $k = 5$  (second row). The main figure of the paper pools all replicate window and empirical neutral null covariances; we show here the windowed temporal covariances tend to shift from being positive (a heavier right tail) to become more negative (a heavier left tail) through time within particular replicates.

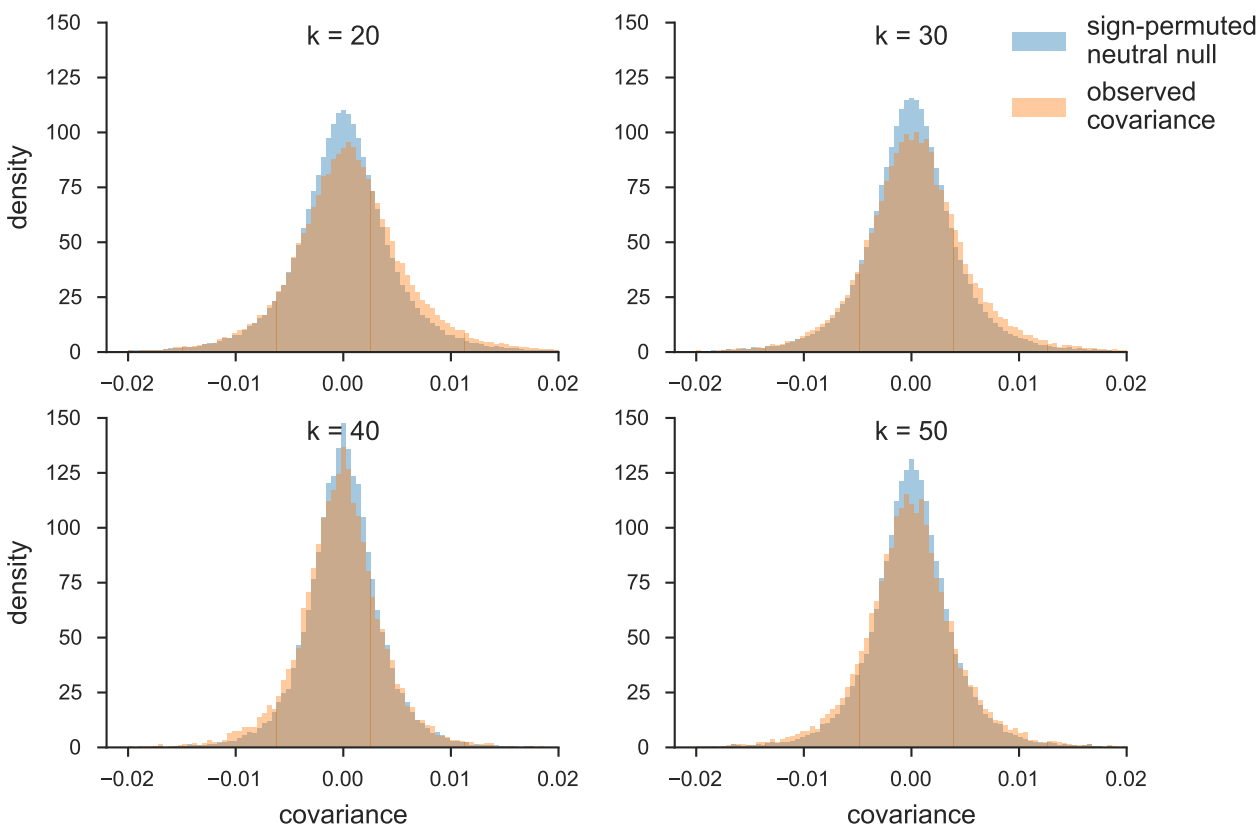

**Figure S10:** The distribution of temporal covariances calculated across 100kb genomic windows from Barghi et al. (2019)'s study (orange) and the block sign permuted empirical neutral null distribution of the windowed covariances (blue). Each panel shows these windowed covariances and the empirical null distribution for covariances  $\text{Cov}(\Delta p_t, \Delta p_{t+k})$ ,  $k$  is the number of generations between allele frequency changes.

705 **1.9 Barghi et al. (2019) Tail Probabilities for Windowed Covariances Distribu-**  
706 **tions**

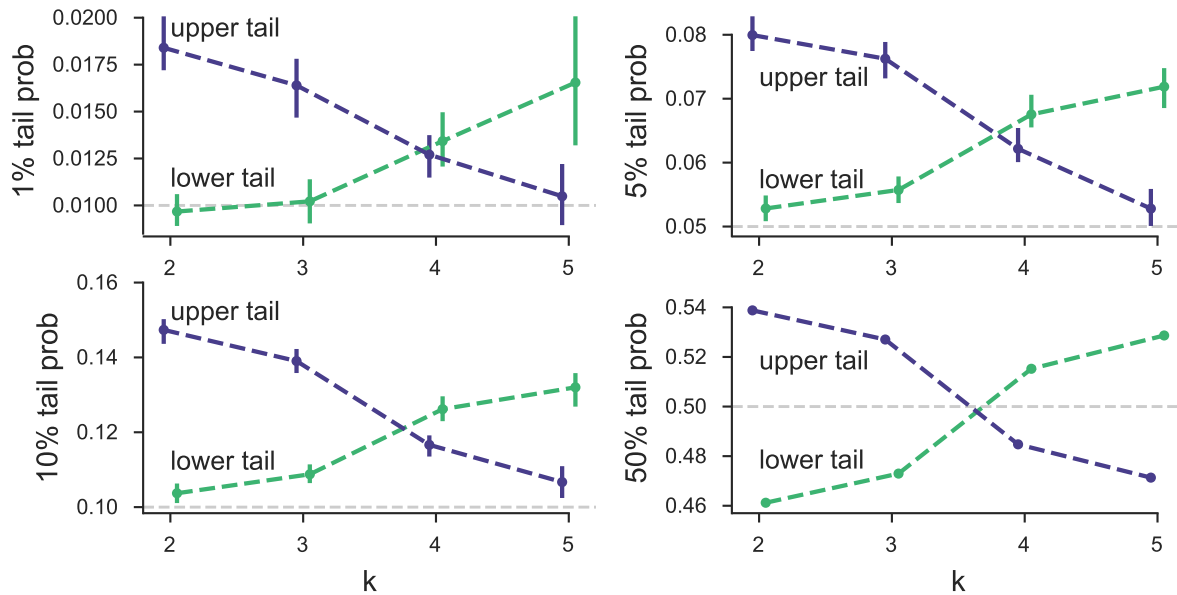

**Figure S11:** Barghi et al. (2019) tail probabilities compared to sign-permuted empirical null distribution for various  $\alpha$  levels.

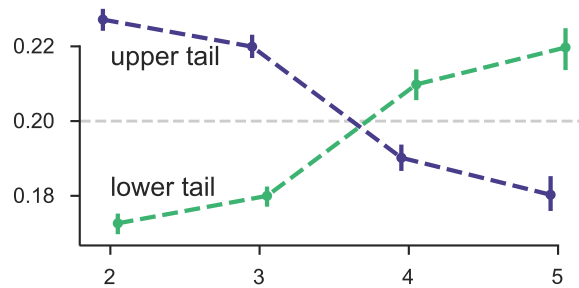

**Figure S12:** The 20% lower and upper tail probabilities for the observed windowed covariances from the Barghi et al. (2019) study, based on sign-permuting at the chromosome level. This permutation empirical null is robust to long-range linkage disequilibrium acting over entire chromosomes (see Supplementary Material section 1.4).
